# Supplementary material for: A short and efficient total synthesis of the bromotyrosine-derived alkaloid psammaplysene A
Source: Royal Society of Chemistry journal article supplement (doi:10.1039/c8ra02052c), 2018-01-01

## ***Supporting Information***

### **A Short and Efficient Total Synthesis of the Bromotyrosine-derived Alkaloid Psammaplysene A**

Jingjing Xu,<sup>ab</sup> Kai Wang<sup>a</sup> and Jinlong Wu<sup>\*a</sup>

<sup>a</sup> Laboratory of Asymmetric Catalysis and Synthesis, Department of Chemistry, Zhejiang University, Hangzhou 310027, China. E-mail: [wyz@zju.edu.cn](mailto:wyz@zju.edu.cn)

<sup>b</sup> Department of Chemistry, Hangzhou Medical College, Hangzhou 310053, China

## **Contents**

**General information**

**Experimental Details**

**Copies of <sup>1</sup>H NMR and <sup>13</sup>C NMR Spectra of Compounds**

## General information

Anhydrous benzene and PhMe were freshly distilled from sodium benzophenone ketyl under N<sub>2</sub>. Anhydrous DCM, MeCN, and Et<sub>3</sub>N were freshly distilled over CaH<sub>2</sub>. Silica gel plates pre-coated on glass were used for thin layer chromatography (TLC) using UV light, iodine vapor, or 7% ethanolic phosphomolybdic acid and heating as the visualizing methods. Silica gel was used for flash column chromatography. Yields refer to chromatographically and spectroscopically (<sup>1</sup>H NMR) homogeneous materials. Reagents were obtained commercially and used as received.

<sup>1</sup>H and <sup>13</sup>C NMR spectra were recorded in the indicated solvent at room temperature (400, 500, or 600 MHz for <sup>1</sup>H and 100, 125, or 150 MHz for <sup>13</sup>C, respectively). Spectral splitting patterns are designated as follows: s, singlet; br, broad; d, doublet; t, triplet; q, quartet; m, multiplet. Infrared (IR) spectra were taken on an FT-IR spectrophotometer. High-resolution mass spectra (HRMS) were measured by the ESI or EI method.

## Experimental Details:

### 3,5-dibromo-4-hydroxybenzaldehyde (**7**)<sup>1</sup>

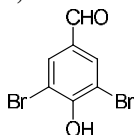

A solution of Br<sub>2</sub> (5.04 g, 1.61 mL, 31.5 mmol) in AcOH (16 mL) was added slowly to a mixture of 4-hydroxybenzaldehyde **5** (1.83 g, 15 mmol), sodium acetate (3.8 g, 46.5 mmol) and AcOH (36 mL) at room temperature over 20 min. After addition, the reaction was kept stirring for 1h at room temperature. The resulting mixture was then poured into 200 mL of water, and a solid precipitated. After filtration, the solid was washed with H<sub>2</sub>O and dried in vacuum to afford compound **7** as a pale solid (3.94 g, 94%).

*R*<sub>f</sub> = 0.48 (100% EtOAc); IR (KBr): 3199 (br), 2858, 1672, 1579, 1482, 1415, 1230, 1199, 1149 cm<sup>-1</sup>; <sup>1</sup>H NMR (400 MHz, CDCl<sub>3</sub>) δ 9.80 (s, 1H), 8.00 (s, 2H), 6.42 (brs, 1H); <sup>13</sup>C NMR (100 MHz, CDCl<sub>3</sub>) δ 188.1, 154.4, 133.6 (×2), 131.3, 110.7 (×2); HRMS (EI+): calcd for C<sub>7</sub>H<sub>4</sub>Br<sub>2</sub>O<sub>2</sub>: 277.8579, found: 277.8578.

### 2,6-dibromo-4-(1,3-dioxolan-2-yl)phenol

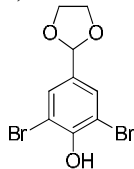

A solution of 3,5-dibromo-4-hydroxybenzaldehyde **7** (2.8 g, 10 mmol), ethylene glycol (840 μL, 15 mmol), and camphorsulfonic acid (70 mg, 0.3 mmol) in 50 mL benzene was refluxed for 2 h, while any water produced was collected in a Dean-Stark trap. Once the reaction was complete, the solution was cooled and then quenched with saturated aqueous Na<sub>2</sub>CO<sub>3</sub> (50 mL). The separated benzene layer was dried over anhydrous Na<sub>2</sub>SO<sub>4</sub>, and concentrated under reduced pressure to afford glycol acetal, which was directly used for the next step without purification. <sup>1</sup>H NMR (400 MHz, CDCl<sub>3</sub>) δ 7.56 (s, 2H), 6.03 (brs, 1H), 5.70 (s, 1H), 4.11-4.08 (m, 2H), 4.03-3.99 (m, 2H).

### 3-[2,6-dibromo-4-(1,3-dioxolan-2-yl)phenoxy]-*N,N*-dimethylpropylamine (**8**)

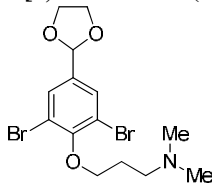

A mixture of glycol acetal, *N,N*-dimethyl-3-chloropropylamine (1.36 mL, 12 mmol), Cs<sub>2</sub>CO<sub>3</sub> (8.14 g, 25 mmol, 2.5 equiv), NaI (374 mg, 2.5 mmol, 0.25 equiv), and CH<sub>3</sub>CN (50 mL) was stirred at 80 °C for 12 h. The reaction mixture was then cooled to room temperature and the solvent was removed under reduced pressure. The residue was purified by flash chromatography (SiO<sub>2</sub>, DCM/CH<sub>3</sub>OH, 10:1) to afford the product **8** (3.31 g, 81% from **7**) as a colorless oil.

*R*<sub>f</sub> = 0.71 (20% MeOH in DCM); IR (film): 2951, 2884, 1550, 1455, 1360, 1259, 1096, 1038, 988 cm<sup>-1</sup>; <sup>1</sup>H NMR (500 MHz, CDCl<sub>3</sub>) δ 7.61 (s, 2H), 5.72 (s, 1H), 4.11–4.00 (m, 6H), 2.67 (t, *J* = 7.5 Hz, 2H), 2.35 (s, 6H), 2.13–2.07 (m, 2H); <sup>13</sup>C NMR (150 MHz, CDCl<sub>3</sub>) δ 153.86, 136.76, 130.97 (×2), 118.40 (×2), 101.87, 71.82, 65.49 (×2), 56.42, 45.32 (×2), 28.03; HRMS (EI<sup>+</sup>): calcd for C<sub>14</sub>H<sub>19</sub>Br<sub>2</sub>NO<sub>3</sub>: 406.9732, found: 406.9731.

### 3,5-dibromo-4-[3-(dimethylamino)propoxy]benzaldehyde (**9**)

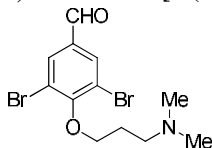

To a solution of **8** (819 mg, 2 mmol) in CH<sub>3</sub>OH (20 mL) was added 3M HCl (20 mL), and the reaction mixture was stirred at the same temperature for 2 h. The reaction mixture was then adjusted to pH 7 with saturated aqueous NaHCO<sub>3</sub>. The reaction mixture was extracted with DCM (3 × 50 mL) and the combined organic layer was washed with brine, dried over anhydrous Na<sub>2</sub>SO<sub>4</sub>, filtered, and concentrated under reduced pressure. The residue was purified by flash chromatography (SiO<sub>2</sub>, DCM/CH<sub>3</sub>OH, 6:1) to afford the product **9** (708 mg, 97%) as a colorless solid.

MP.: 166–167 °C; *R*<sub>f</sub> = 0.63 (20% MeOH in DCM); IR (KBr): 2952, 2680, 1688, 1547, 1469, 1366, 1257, 1185 cm<sup>-1</sup>; <sup>1</sup>H NMR (500 MHz, CDCl<sub>3</sub>) δ 9.86 (s, 1H), 8.03 (s, 2H), 4.19 (t, *J* = 5.5 Hz, 2H), 3.40 (t, *J* = 8.0 Hz, 2H), 2.87 (s, 6H), 2.54–2.48 (m, 2H); <sup>13</sup>C NMR (100 MHz, CDCl<sub>3</sub>) δ 188.37, 157.22, 134.63, 134.03 (×2), 119.31 (×2), 70.21, 55.78, 43.33 (×2), 25.51; HRMS (EI<sup>+</sup>): calcd for C<sub>12</sub>H<sub>15</sub>Br<sub>2</sub>NO<sub>2</sub>: 362.9470, found: 362.9468.

### (*E*)-3-[3,5-dibromo-4-(3-(dimethylamino)propoxy)phenyl]acrylic acid (**3**)<sup>2</sup>

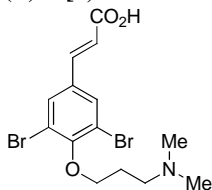

A round-bottom flask with a reflux condenser was charged with benzaldehyde **9** (158 mg, 0.43 mmol), piperidine (8 μL, 0.08 mmol) and toluene (1.5 mL). Then malonic acid (47 mg, 0.45 mmol) and triethylamine (78 μL, 0.6 mmol) were added, and the reaction mixture was stirred at reflux. Two additional portion of malonic acid (47 mg, 0.45 mmol) was added to the reaction mixture after stirring of 1 h and 3 h, respectively. After refluxing for 5 h, the reaction mixture was cooled to room temperature and the solvent was removed under reduced pressure. The residue was purified by column chromatography (SiO<sub>2</sub>, DCM/CH<sub>3</sub>OH, 2:1) to provide the acid **3** (140 mg, 80%) as a white solid.

MP.: 198–199 °C; *R*<sub>f</sub> = 0.35 (20% MeOH in DCM); IR (KBr): 3448 (br), 2951, 1636, 1559, 1456, 1410, 1260 cm<sup>-1</sup>; <sup>1</sup>H NMR (600 MHz, CD<sub>3</sub>OD) δ 7.80 (s, 2H), 7.38 (d, *J* = 16.2 Hz, 1H), 6.47 (d, *J* = 15.6 Hz, 1H), 4.16 (t, *J* = 5.4 Hz, 2H), 3.51 (t, *J* = 7.8 Hz, 2H), 2.96 (s, 6H), 2.34–2.30 (m, 2H); <sup>13</sup>C NMR (100 MHz, CD<sub>3</sub>OD) δ 173.22, 154.12, 138.72, 136.20, 132.81 (×2), 126.92, 119.39 (×2), 71.28, 56.62, 43.54 (×2), 26.46.

### *N,N*-Dimethyltyramine (**10**)

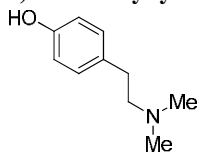

To a solution of tyramine hydrochloride **6** (1.736 g, 10 mmol) and NaHCO<sub>3</sub> (1.68 g, 20 mmol) in MeOH (50 mL)

were added 37% aqueous formalin (3.0 mL, 40 mmol) and 10% Pd/C (1.15 g), and the mixture was stirred at room temperature for 5 h under hydrogen. The reaction mixture was filtered off through a plug of Celite with washing by MeOH and the combined filtrate was concentrated to provide *N,N*-dimethyltyramine **10** (1.62 g, 98%) as colorless crystals. The residue was used in the next reaction without further purification.

$R_f = 0.3$  (20% MeOH in DCM); IR (KBr): 2933, 2795, 1611, 1514, 1468, 1388, 1256, 1170, 866  $\text{cm}^{-1}$ ;  $^1\text{H}$  NMR (400 MHz,  $\text{CDCl}_3$ )  $\delta$  9.24 (brs, 1H), 6.99 (d,  $J = 8.4$  Hz, 2H), 6.67 (dd,  $J = 8.4, 3.2$  Hz, 2H), 2.76-2.71 (m, 2H), 2.63-2.59 (m, 2H), 2.36 (s, 6H);  $^{13}\text{C}$  NMR (100 MHz,  $\text{CDCl}_3$ )  $\delta$  155.44, 130.12, 129.53 ( $\times 2$ ), 115.76 ( $\times 2$ ), 61.44, 44.83 ( $\times 2$ ), 32.52; HRMS (EI+): calcd for  $\text{C}_{10}\text{H}_{15}\text{NO}$ : 165.1154, found: 165.1150.

### 2,6-dibromo-*N,N*-Dimethyltyramine (**11**)<sup>3</sup>

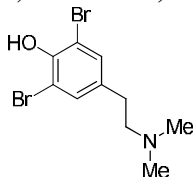

A solution of KBr (3.9 g) and  $\text{Br}_2$  (790  $\mu\text{L}$ ) in water (13 mL) was added dropwise to a solution of **10** (1.16 g, 7 mmol) in a mixed solvent of methanol/water 1:1 (7 mL). After stirring for 0.5 h at room temperature, the reaction was quenched by adding saturated aqueous  $\text{Na}_2\text{SO}_3$  (5 mL) and adjusted to pH 7 with saturated aqueous  $\text{NaHCO}_3$ . The solid precipitated was filtered off, washed with water and dried under reduced pressure. The residue was purified by column chromatography ( $\text{SiO}_2$ , DCM/ $\text{CH}_3\text{OH}$ , 7:1) to afford **11** (1.83 g, 81%) as a colorless solid.

MP.: 206–208  $^\circ\text{C}$ ;  $R_f = 0.5$  (20% MeOH in DCM); IR (KBr): 3378 (br), 2957, 2689, 1476, 1312, 1151  $\text{cm}^{-1}$ ;  $^1\text{H}$  NMR (400 MHz,  $\text{DMSO}-d_6$ )  $\delta$  10.3 (brs, 1H) 7.49 (s, 2H), 3.24-3.20 (m, 2H), 2.95-2.91 (m, 2H), 2.74 (s, 6H);  $^{13}\text{C}$  NMR (100 MHz,  $\text{CD}_3\text{OD}$ )  $\delta$  151.69, 133.75 ( $\times 2$ ), 131.27, 112.52 ( $\times 2$ ), 59.47, 43.63 ( $\times 2$ ), 30.12;

### *N*-Boc-2,6-dibromo-*N,N*-Dimethyltyramine (**12**)<sup>2</sup>

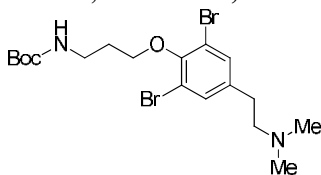

A mixture of **11** (1.0 g, 3.1 mmol), Boc-protected 3-bromo-propylamine (959 mg, 4.03 mmol),  $\text{Cs}_2\text{CO}_3$  (2.52 g, 7.75 mmol, 2.5 equiv), NaI (116 mg, 0.775 mmol, 0.25 equiv), and  $\text{CH}_3\text{CN}$  (20 mL) was stirred in a sealed tube at 80  $^\circ\text{C}$  for 12h. The reaction mixture was then cooled to room temperature and the solvent was removed under reduced pressure. The residue was purified by flash chromatography ( $\text{SiO}_2$ , DCM/ $\text{CH}_3\text{OH}$ , 10:1) to afford the product **12** (1.38 g, 93%) as a colorless solid.

MP.: 41–43  $^\circ\text{C}$ ;  $R_f = 0.65$  (20% MeOH in DCM); IR (KBr): 2974, 1708, 1458, 1253, 1173  $\text{cm}^{-1}$ ;  $^1\text{H}$  NMR (600 MHz,  $\text{CD}_3\text{OD}$ )  $\delta$  7.45 (s, 2H), 4.00 (t,  $J = 6.6$  Hz, 2H), 3.31 (t,  $J = 6.6$  Hz, 2H), 2.74 (t,  $J = 7.2$  Hz, 2H), 2.57 (t,  $J = 7.2$  Hz, 2H), 2.31 (s, 6H), 2.02–1.98 (m, 2H), 1.43 (s, 9H).  $^{13}\text{C}$  NMR (100 MHz,  $\text{CD}_3\text{OD}$ )  $\delta$  158.47, 152.79, 140.27, 134.09 ( $\times 2$ ), 119.02 ( $\times 2$ ), 79.94, 72.12, 61.52, 45.22 ( $\times 2$ ), 38.64, 33.02, 31.28, 28.80 ( $\times 3$ ).

### 3-[2,6-Dibromo-4-(2-dimethylamino-ethyl)-phenoxy]-propylamine dihydrochloride (**4**)<sup>2</sup>

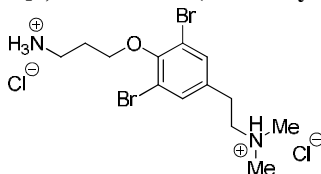

To a solution of **12** (167 mg, 0.348 mmol) in  $\text{CH}_3\text{OH}$  (10 mL) was added 3M HCl (3.5 mL), and the reaction mixture was stirred at the same temperature for 2 h. The solvent was removed under reduced pressure and the obtained solid **4** was shown by NMR as pure compound (155 mg, 98%) without purification.

MP.: 266–268  $^\circ\text{C}$ ;  $R_f = 0.25$  (33% MeOH in DCM); IR (KBr): 3422 (br), 2958, 1458, 1255, 1059  $\text{cm}^{-1}$ ;  $^1\text{H}$  NMR (600 MHz,  $\text{CD}_3\text{OD}$ )  $\delta$  7.63 (s, 2H), 4.12 (t,  $J = 6.0$  Hz, 2H), 3.38–3.35 (m, 2H), 3.31–3.28 (m, 2H), 3.06–3.03 (m,

2H), 2.93 (s, 6H), 2.24–2.20 (m, 2H);  $^{13}\text{C}$  NMR (100 MHz,  $\text{CD}_3\text{OD}$ )  $\delta$  152.43, 139.66, 134.26 ( $\times 2$ ), 118.96 ( $\times 2$ ), 71.58, 60.71, 44.70 ( $\times 2$ ), 38.86, 32.18, 29.17.

### Psammaplysene A (**1**)<sup>2</sup>

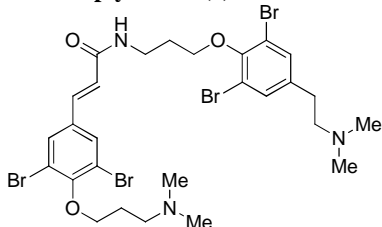

To a mixture of acid **3** (101 mg, 0.25 mmol) and amine **4** (108 mg, 0.24 mmol) in DCM was added TEA (100  $\mu\text{L}$ , 0.74 mmol), DMAP (15 mg, 0.123 mmol), DIC (62 mg, 0.49 mmol), and the reaction mixture was stirred at room temperature for 10 h. The reaction mixture was extracted with DCM ( $3 \times 20$  mL). The combined organic layer was washed with brine, dried over anhydrous  $\text{Na}_2\text{SO}_4$ , and concentrated under reduced pressure. The residue was purified by flash chromatography ( $\text{SiO}_2$ ,  $\text{DCM}/\text{CH}_3\text{OH}$ , 3:1) to afford **1** (157 mg, 85%) as a white solid.

MP.: 115–116  $^\circ\text{C}$ ;  $R_f=0.4$  (20% MeOH in DCM); IR (KBr): 3285 (br), 2945, 2766, 1659, 1624, 1542, 1457, 1261, 1039, 974  $\text{cm}^{-1}$ ;  $^1\text{H}$  NMR (400 MHz,  $\text{CD}_3\text{OD}$ )  $\delta$  7.76 (s, 2H), 7.44 (s, 2H), 7.37 (d,  $J = 15.6$  Hz, 1H), 6.58 (d,  $J = 15.6$  Hz, 1H), 4.06–4.03 (two overlapping triplets appearing as a multiplet,  $J = 6.4$  Hz for both, 4H), 3.59 (t,  $J = 7.2$  Hz, 2H), 2.74–2.65 (m, 4H), 2.55–2.51 (m, 2H), 2.32 (s, 6H), 2.29 (s, 6H), 2.16–2.02 (m, 4H);  $^{13}\text{C}$  NMR (100 MHz,  $\text{CD}_3\text{OD}$ )  $\delta$  167.79, 155.18, 152.68, 140.42, 138.06, 135.33, 134.08 ( $\times 2$ ), 133.00 ( $\times 2$ ), 124.01, 119.67 ( $\times 2$ ), 119.00 ( $\times 2$ ), 72.85, 72.07, 61.59, 57.39, 45.38 ( $\times 2$ ), 45.29 ( $\times 2$ ), 38.07, 33.14, 30.87, 28.86.

### References

1. L. He, L. Zhang, X. Liu, X. Li, M. Zheng, H. Li, K. Yu, K. Chen, X. Shen, H. Jiang and H. Liu, *J. Med. Chem.*, **2009**, 52, 2465–2481.
2. S. N. Georgiades and J. Clardy, *Org. Lett.*, **2005**, 7, 4091–4094.
3. H. Kigoshi, K. Kanematsu, K. Yokota and D. Uemura, *Tetrahedron*, **2000**, 56, 9063–9070.

### Copies of $^1\text{H}$ NMR and $^{13}\text{C}$ NMR Spectra of Compounds

# 3,5-dibromo-4-hydroxybenzaldehyde (7)

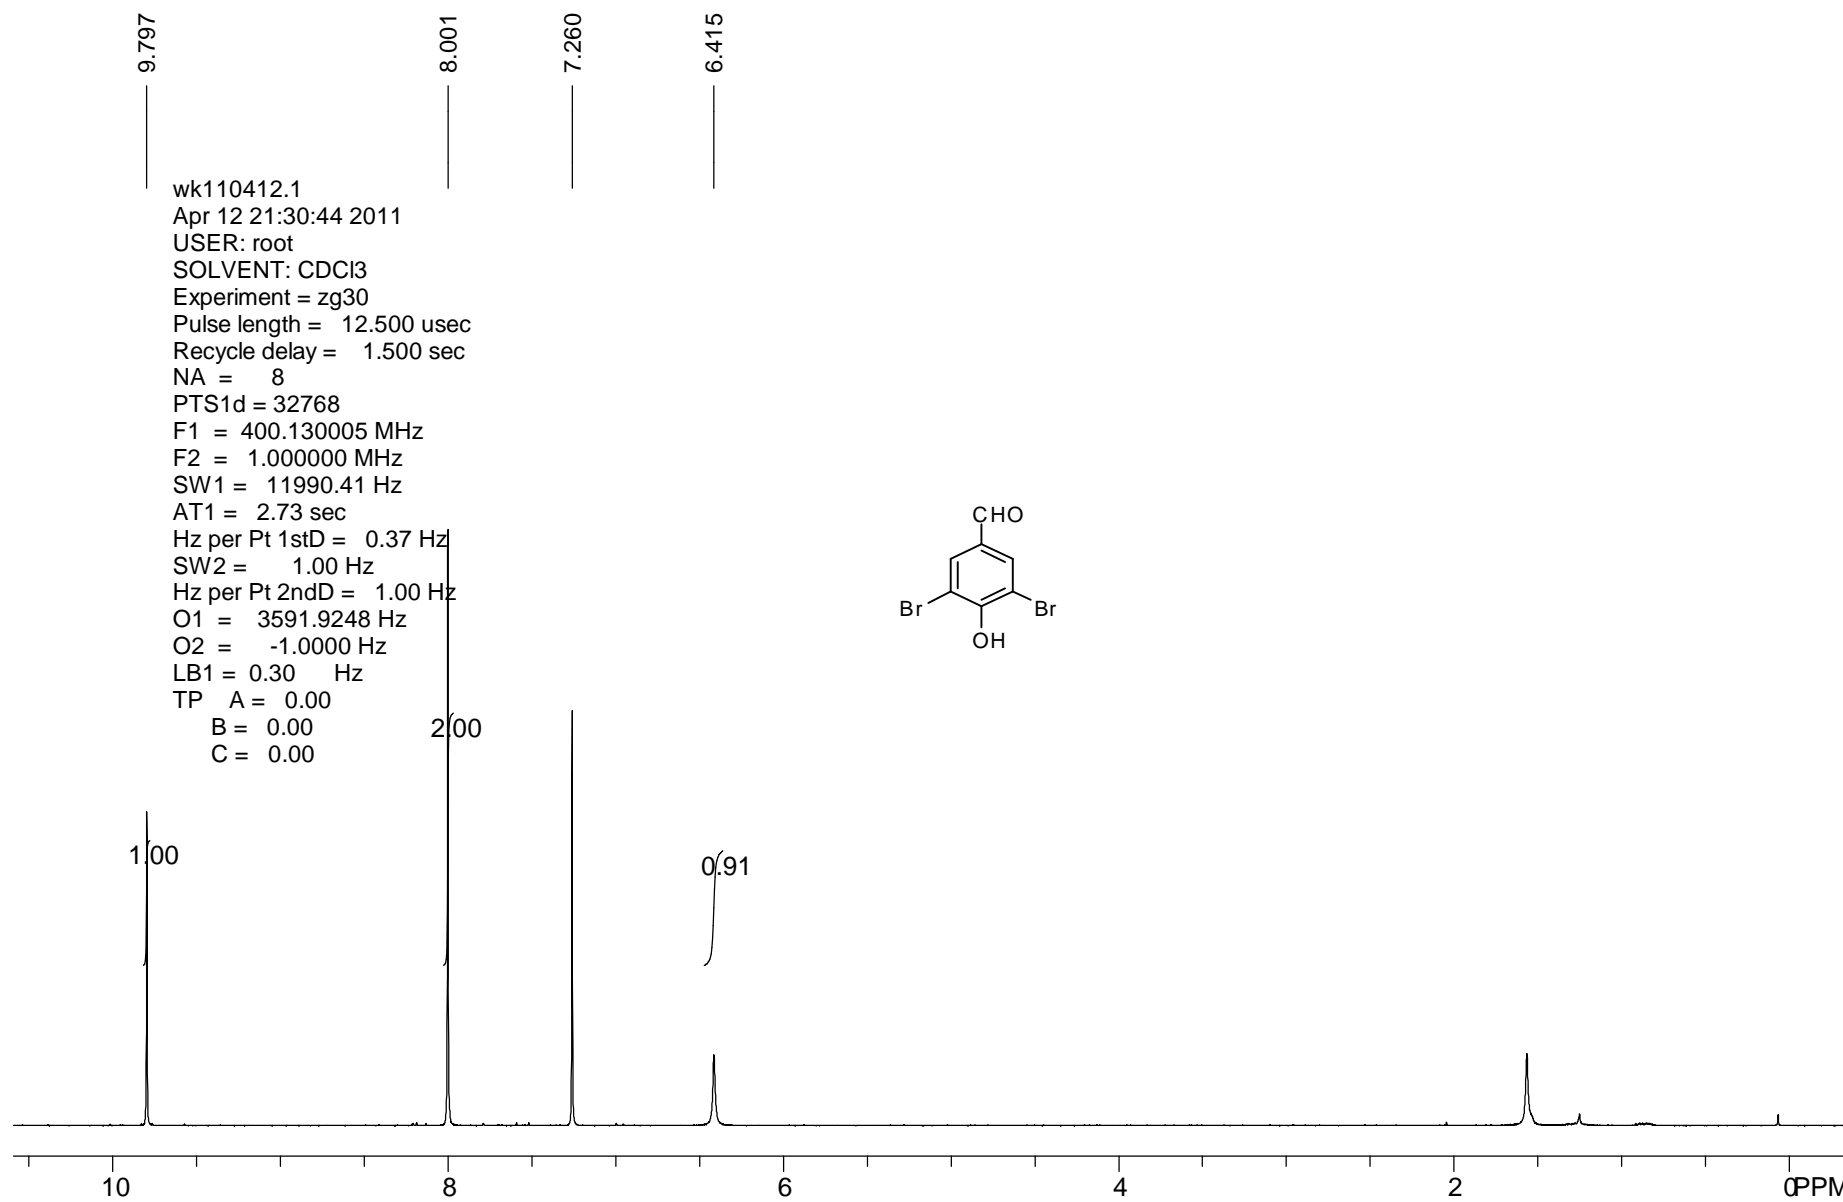

# 3,5-dibromo-4-hydroxybenzaldehyde (7)

188.091

154.373

133.646  
131.346

110.725

77.322  
77.000  
76.685

wk110412  
SOLVENT: CDCl<sub>3</sub>  
Experiment = zgdc30  
Pulse length = 7.500 usec  
Recycle delay = 1.000 sec  
NA = 361  
PTS1d = 32768  
F1 = 100.612778 MHz  
F2 = 1.000000 MHz  
SW1 = 25125.63 Hz  
AT1 = 1.30 sec  
Hz per Pt 1stD = 0.77 Hz  
SW2 = 1.00 Hz  
Hz per Pt 2ndD = 1.00 Hz  
O1 = 11065.9326 Hz  
O2 = -1.0000 Hz  
LB1 = 2.00 Hz  
TP A = 0.00  
B = 0.00  
C = 0.00

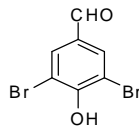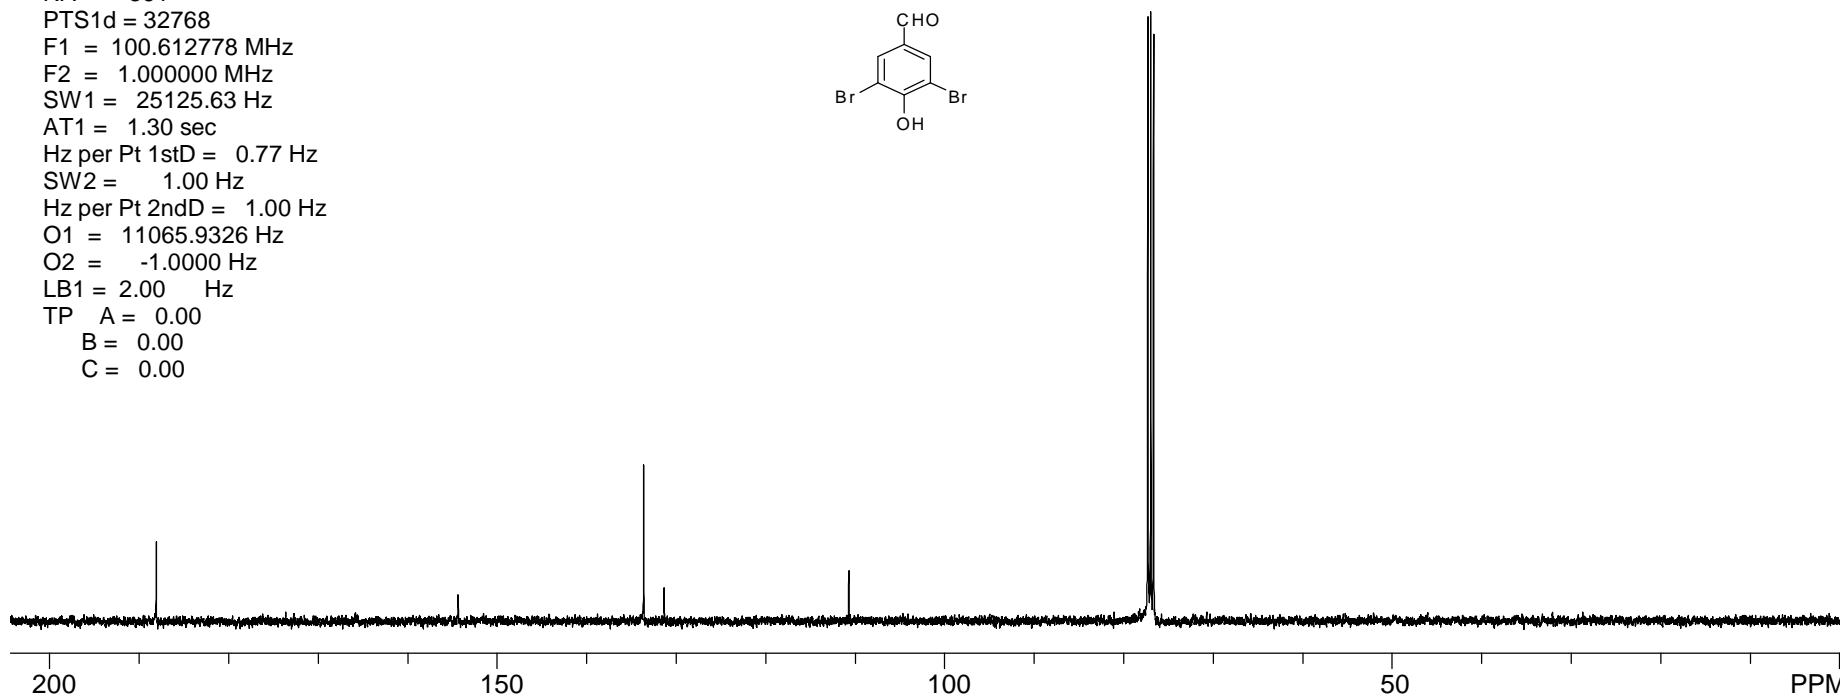

7.561  
7.260  
6.032  
5.701  
4.114  
4.097  
4.091  
4.085  
4.079  
4.026  
4.018  
4.014  
4.008  
3.991  
3.934  
1.235

wk101230  
SOLVENT: CDCl3  
Experiment = zg30  
Pulse length = 9.800 usec  
Recycle delay = 1.500 sec  
NA = 8  
PTS1d = 32768  
F1 = 400.130005 MHz  
F2 = 1.000000 MHz  
SW1 = 11990.41 Hz  
AT1 = 2.73 sec  
Hz per Pt 1stD = 0.37 Hz  
SW2 = 1.00 Hz  
Hz per Pt 2ndD = 1.00 Hz  
O1 = 3598.7095 Hz  
O2 = -1.0000 Hz  
LB1 = 0.30 Hz  
TP A = 0.00  
B = 0.00  
C = 0.00

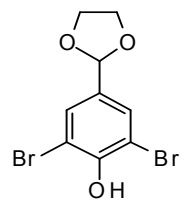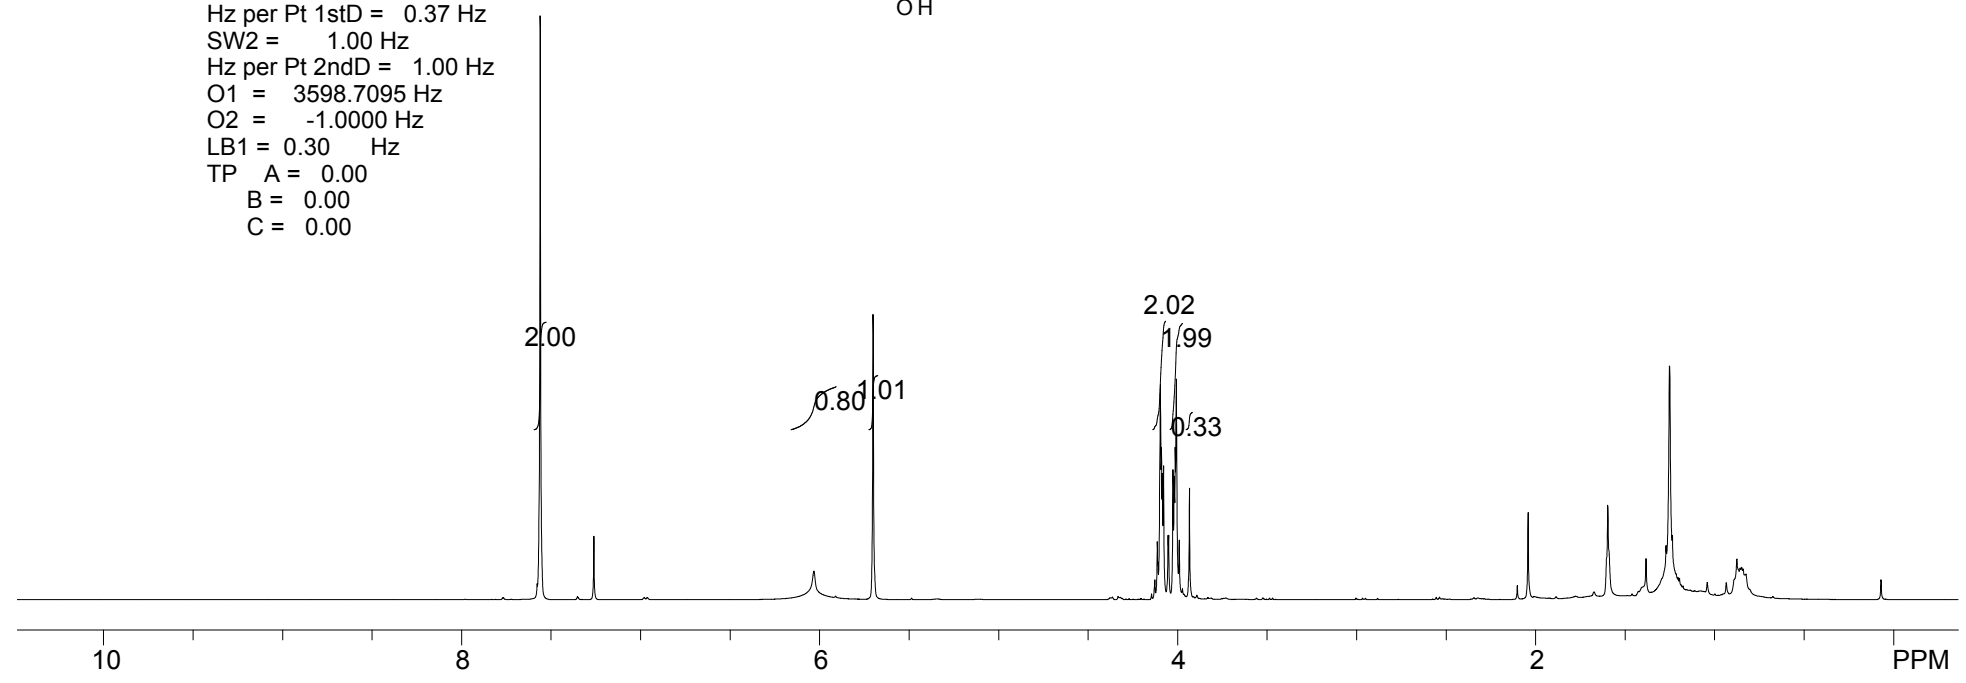



XJJ170711

7.608 7.260 5.720 4.108 4.094 4.089 4.085 4.080 4.064 4.060 4.052 4.039 4.033 4.027 4.023 4.018 4.005 2.682 2.667 2.652 2.351 2.129 2.116 2.104 2.101 2.099 2.086 2.073 1.249

**3-[2,6-dibromo-4-(1,3-dioxolan-2-yl)phenoxy]-N,N-dimethylpropylamine (8)**

| Parameter         | Value                                   |
|-------------------|-----------------------------------------|
| Comment           |                                         |
| Origin            | Bruker BioSpin GmbH                     |
| Solvent           | CDCl3                                   |
| Temperature       | 296.7                                   |
| Pulse Sequence    | zg30                                    |
| Experiment        | 1D                                      |
| Probe             | 5 mm PABBO BB-1H/ D Z-GRD Z113652/ 0115 |
| Number of Scans   | 16                                      |
| Receiver Gain     | 144                                     |
| Relaxation Delay  | 1.0000                                  |
| Pulse Width       | 11.7000                                 |
| Presaturation     |                                         |
| Frequency         |                                         |
| Acquisition Time  | 2.1846                                  |
| Acquisition Date  | 2017-07-18T14:13:00                     |
| Modification Date | 2017-07-18T20:13:42                     |
| Class             |                                         |
| Spectrometer      | 500.13                                  |
| Frequency         |                                         |
| Spectral Width    | 15000.0                                 |
| Lowest Frequency  | -3499.0                                 |
| Nucleus           | 1H                                      |
| Acquired Size     | 32768                                   |
| Spectral Size     | 131072                                  |

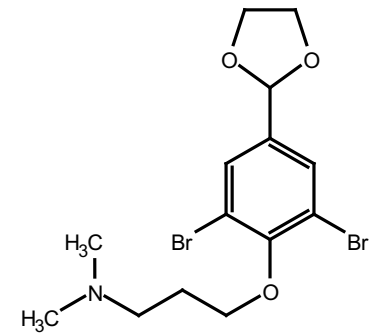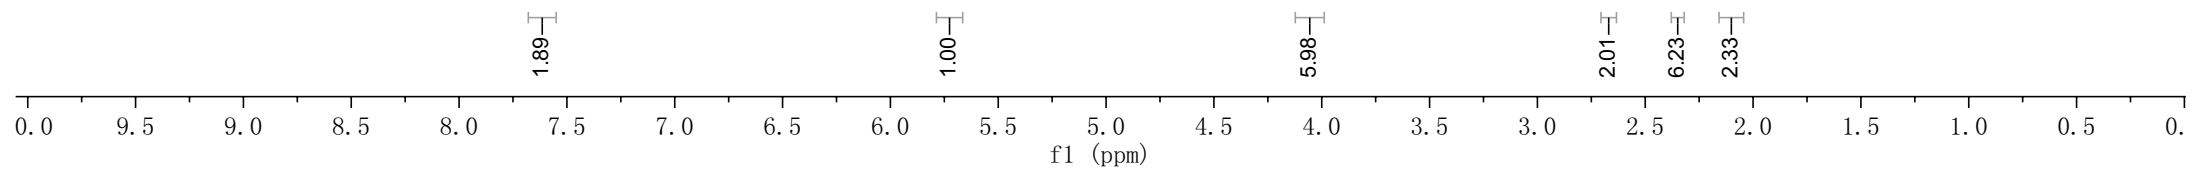

XJJ170711

—153.864

—136.758

—130.967

—118.402

—101.869

77.372 cdcl3

77.161 cdcl3

76.948 cdcl3

71.819

—65.493

—56.422

—45.317

—28.034

**3-[2,6-dibromo-4-(1,3-dioxolan-2-yl)phenoxy]-N,N-dimethylpropylamine (8)**

| Parameter         | Value                                                                      |
|-------------------|----------------------------------------------------------------------------|
| Comment           | Zhejiang University Agilent<br>600 DD2 Onenmr<br>Sample:XJJ170711 in CDCl3 |
| Origin            | Varian                                                                     |
| Solvent           | cdcl3                                                                      |
| Temperature       | 27.0                                                                       |
| Pulse Sequence    | s2pul                                                                      |
| Experiment        | 1D                                                                         |
| Probe             | onenmr                                                                     |
| Number of Scans   | 512                                                                        |
| Receiver Gain     | 30                                                                         |
| Relaxation Delay  | 2.0000                                                                     |
| Pulse Width       | 0.0000                                                                     |
| Acquisition Time  | 0.8651                                                                     |
| Acquisition Date  | 2017-07-25T14:11:16                                                        |
| Modification Date | 2017-07-25T14:11:36                                                        |
| Spectrometer      | 150.83                                                                     |
| Frequency         |                                                                            |
| Spectral Width    | 37878.8                                                                    |
| Lowest Frequency  | -2350.2                                                                    |
| Nucleus           | 13C                                                                        |
| Acquired Size     | 32768                                                                      |
| Spectral Size     | 65536                                                                      |

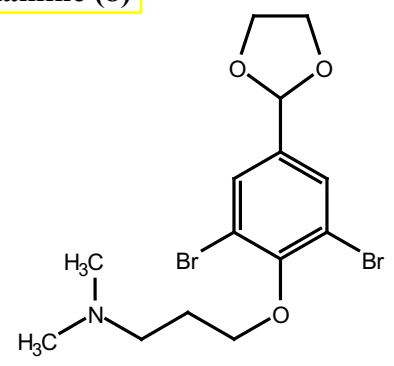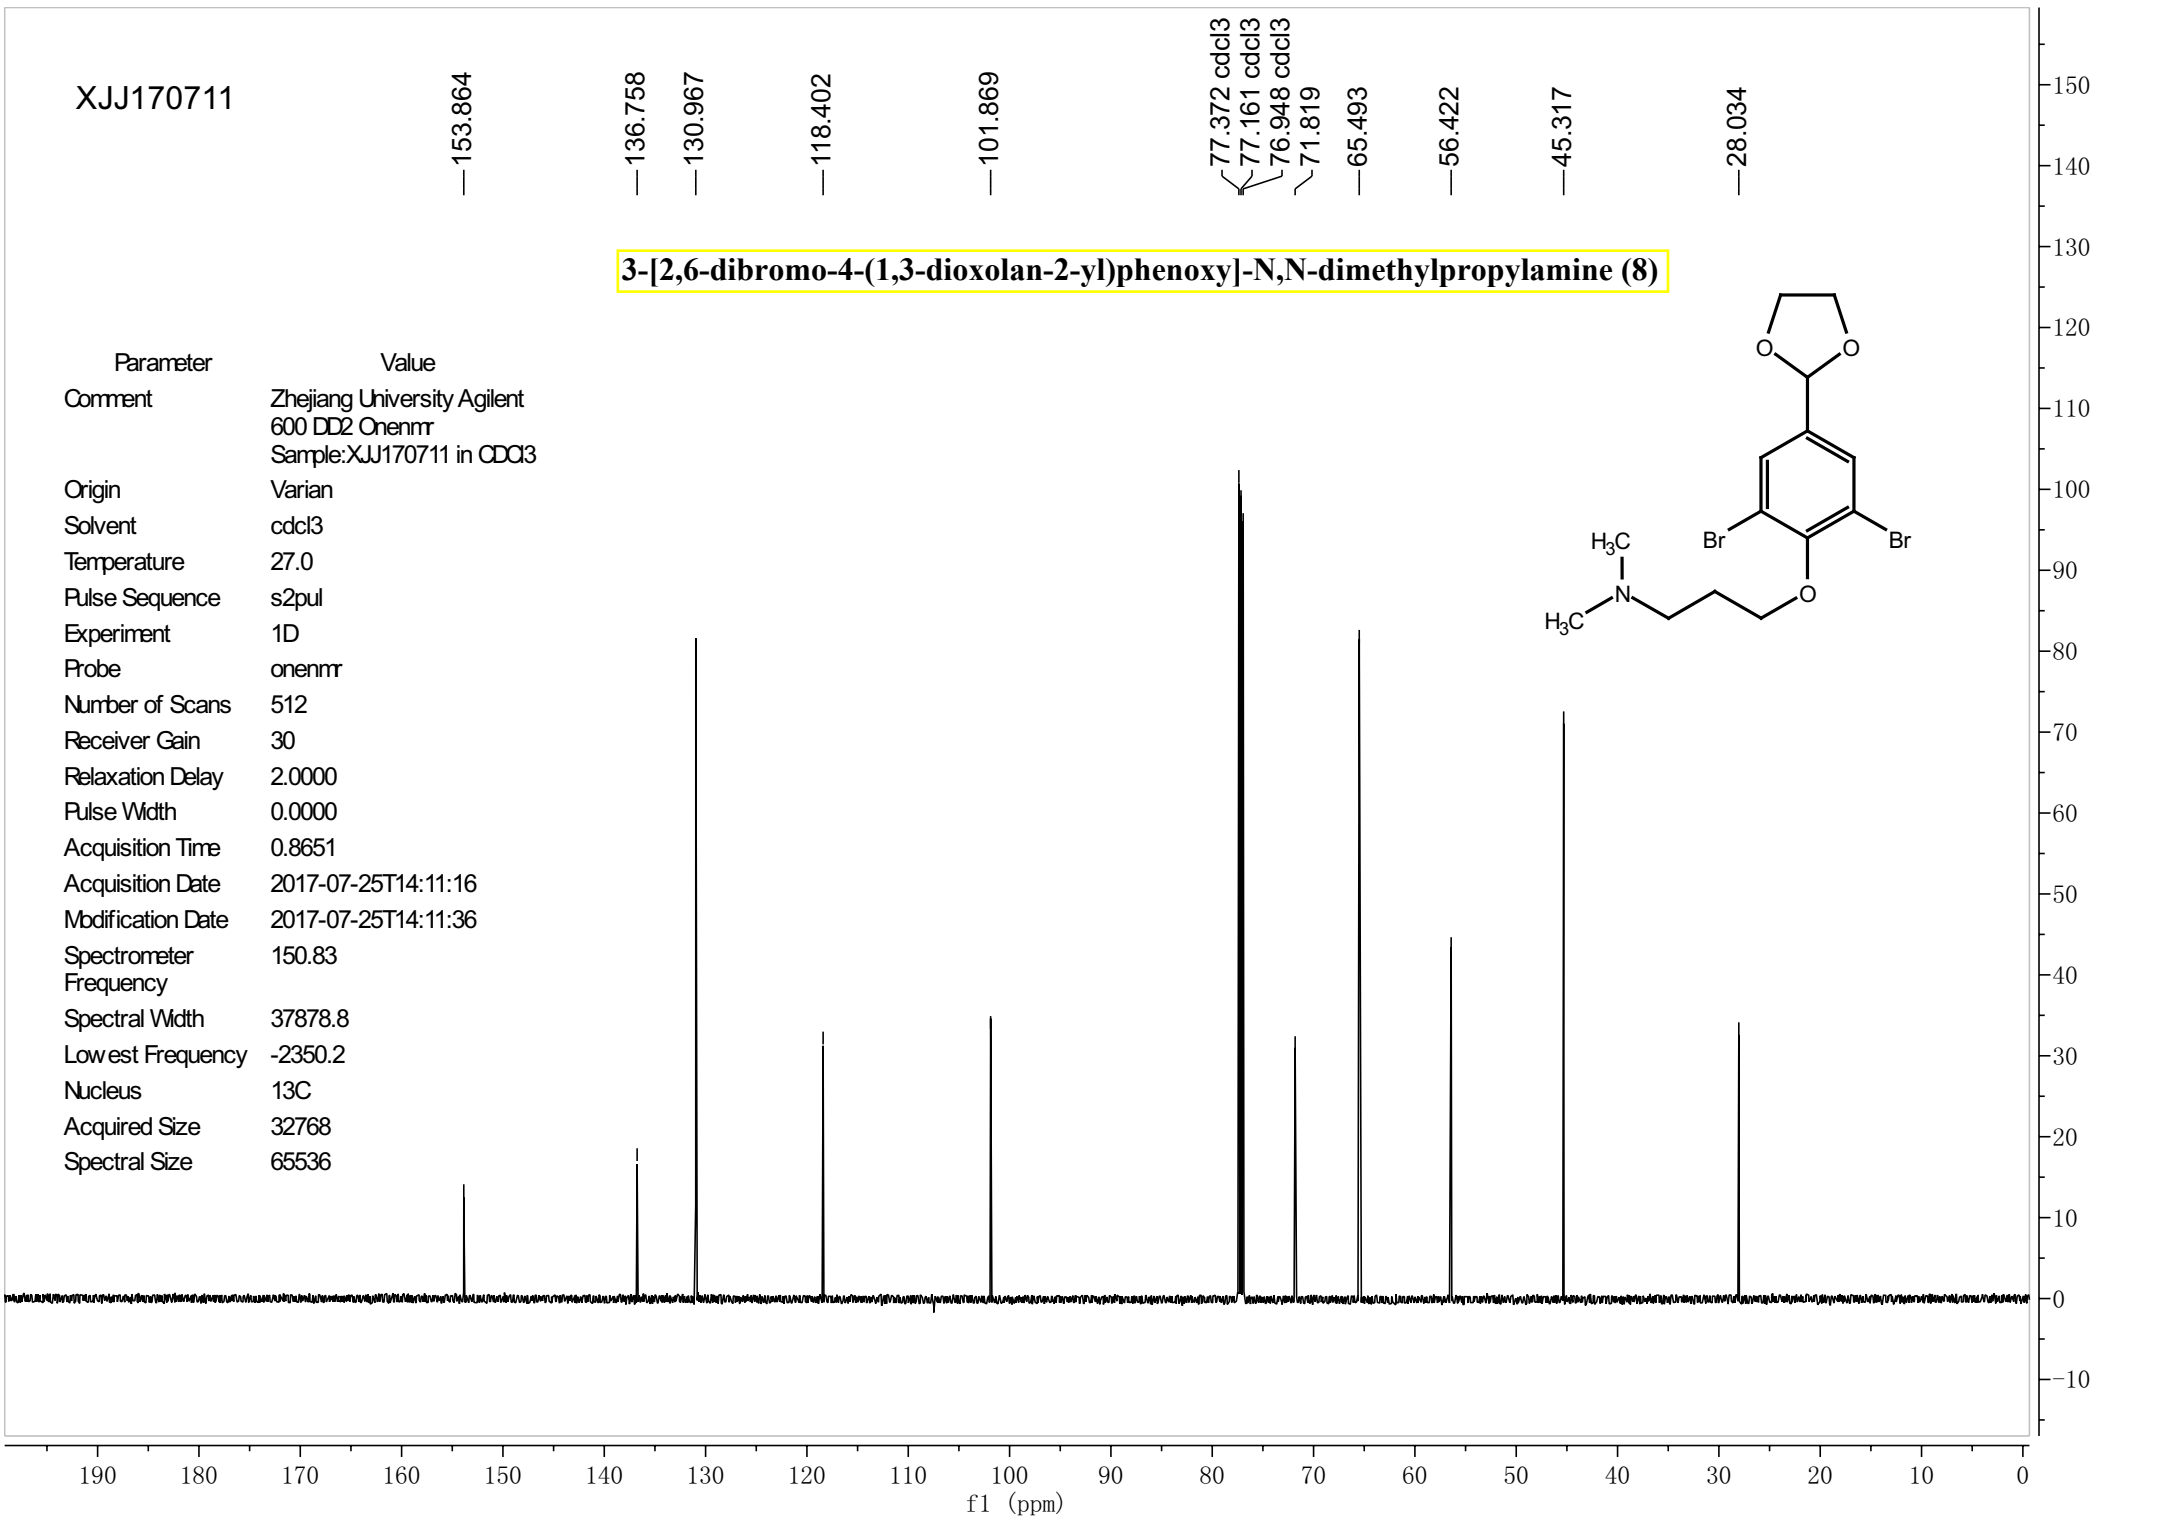

XJJ170728

—9.863

—8.033

—7.260

4.204  
4.193  
4.182

3.414  
3.398  
3.382  
2.868  
2.538  
2.528  
2.517  
2.506  
2.495  
2.484

**3,5-dibromo-4-[3-(dimethylamino)propoxy]benzaldehyde (9)**

| Parameter         | Value                                   |
|-------------------|-----------------------------------------|
| Comment           |                                         |
| Origin            | Bruker BioSpin GmbH                     |
| Solvent           | CDCl3                                   |
| Temperature       | 297.0                                   |
| Pulse Sequence    | zg30                                    |
| Experiment        | 1D                                      |
| Probe             | 5 mm PABBO BB-1H/ D Z-GRD Z113652/ 0115 |
| Number of Scans   | 16                                      |
| Receiver Gain     | 203                                     |
| Relaxation Delay  | 1.0000                                  |
| Pulse Width       | 11.7000                                 |
| Presaturation     |                                         |
| Frequency         |                                         |
| Acquisition Time  | 2.1846                                  |
| Acquisition Date  | 2017-08-01T21:13:00                     |
| Modification Date | 2017-08-02T03:13:26                     |
| Class             |                                         |
| Spectrometer      | 500.13                                  |
| Frequency         |                                         |
| Spectral Width    | 15000.0                                 |
| Lowest Frequency  | -3499.0                                 |
| Nucleus           | 1H                                      |
| Acquired Size     | 32768                                   |
| Spectral Size     | 131072                                  |

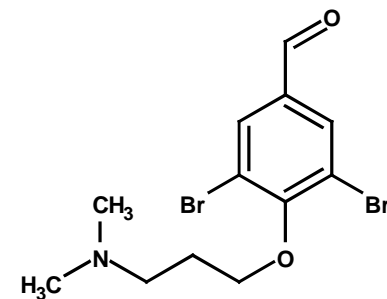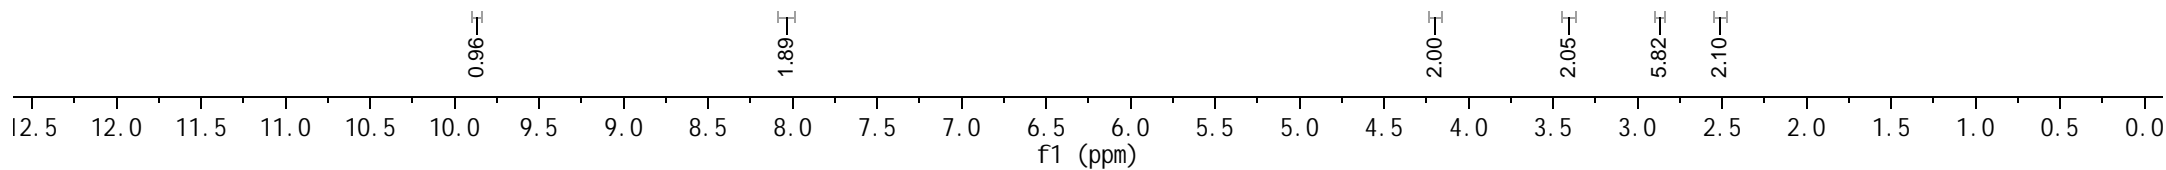

**3,5-dibromo-4-[3-(dimethylamino)propoxy]benzaldehyde (9)**

| Parameter         | Value                                   |
|-------------------|-----------------------------------------|
| Comment           |                                         |
| Origin            | Bruker BioSpin GmbH                     |
| Solvent           | CDCl3                                   |
| Temperature       | 297.0                                   |
| Pulse Sequence    | zg30                                    |
| Experiment        | 1D                                      |
| Probe             | 5 mm PABBO BB-1H/ D Z-GRD Z113652/ 0115 |
| Number of Scans   | 16                                      |
| Receiver Gain     | 203                                     |
| Relaxation Delay  | 1.0000                                  |
| Pulse Width       | 11.7000                                 |
| Presaturation     |                                         |
| Frequency         |                                         |
| Acquisition Time  | 2.1846                                  |
| Acquisition Date  | 2017-08-01T21:13:00                     |
| Modification Date | 2017-08-02T03:13:26                     |
| Class             |                                         |
| Spectrometer      | 500.13                                  |
| Frequency         |                                         |
| Spectral Width    | 15000.0                                 |
| Lowest Frequency  | -3499.0                                 |
| Nucleus           | 1H                                      |
| Acquired Size     | 32768                                   |
| Spectral Size     | 131072                                  |

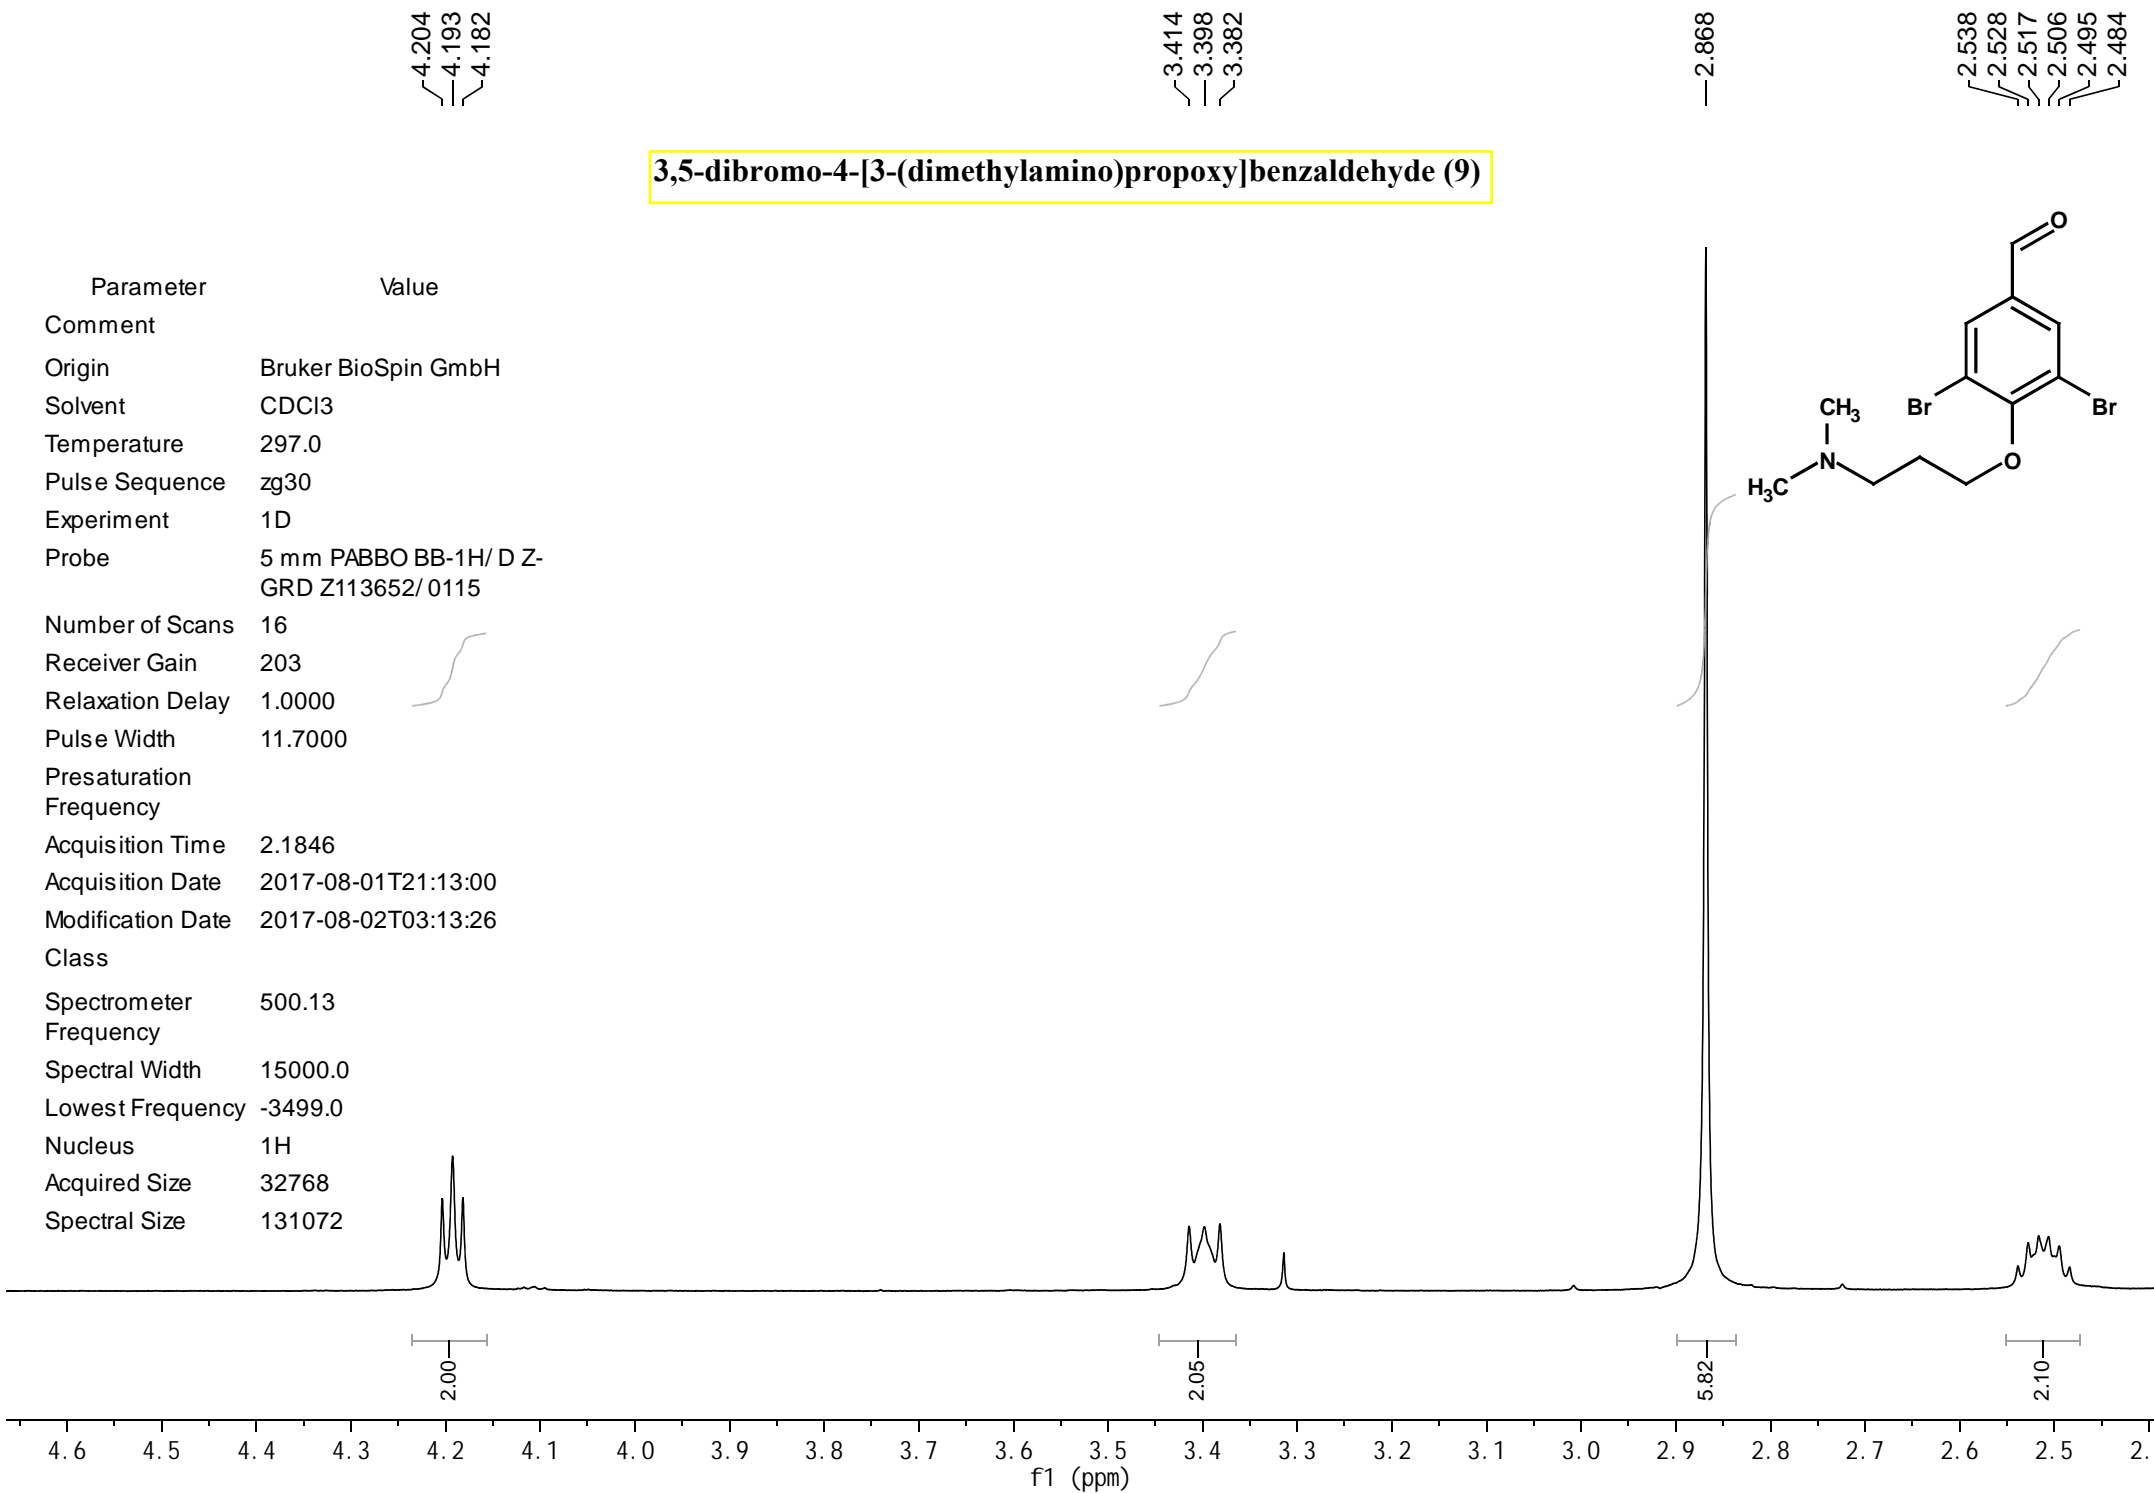

**3,5-dibromo-4-[3-(dimethylamino)propoxy]benzaldehyde (9)**

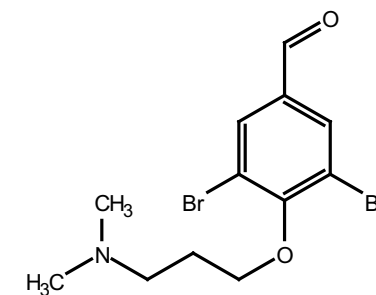

| Parameter      | Value                                              |
|----------------|----------------------------------------------------|
| Comment        | xjj170728-C                                        |
| Origin         | Bruker BioSpin GmbH                                |
| Solvent        | CDCl3                                              |
| Temperature    | 296.1                                              |
| Pulse Sequence | zgpg30                                             |
| Experiment     | 1D                                                 |
| Probe          | 5 mm PABBO BB/<br>19F-1H/ D Z-GRD<br>Z108618/ 0497 |

|                   |                     |
|-------------------|---------------------|
| Number of Scans   | 512                 |
| Receiver Gain     | 170                 |
| Relaxation Delay  | 1.5000              |
| Pulse Width       | 10.0000             |
| Presaturation     |                     |
| Frequency         |                     |
| Acquisition Time  | 1.1011              |
| Acquisition Date  | 2017-09-17T08:40:00 |
| Modification Date | 2017-09-17T23:40:40 |

|                |         |
|----------------|---------|
| Class          |         |
| Spectrometer   | 100.62  |
| Frequency      |         |
| Spectral Width | 29761.9 |
| Lowest         | -4820.6 |
| Frequency      |         |
| Nucleus        | 13C     |
| Acquired Size  | 32768   |
| Spectral Size  | 65536   |

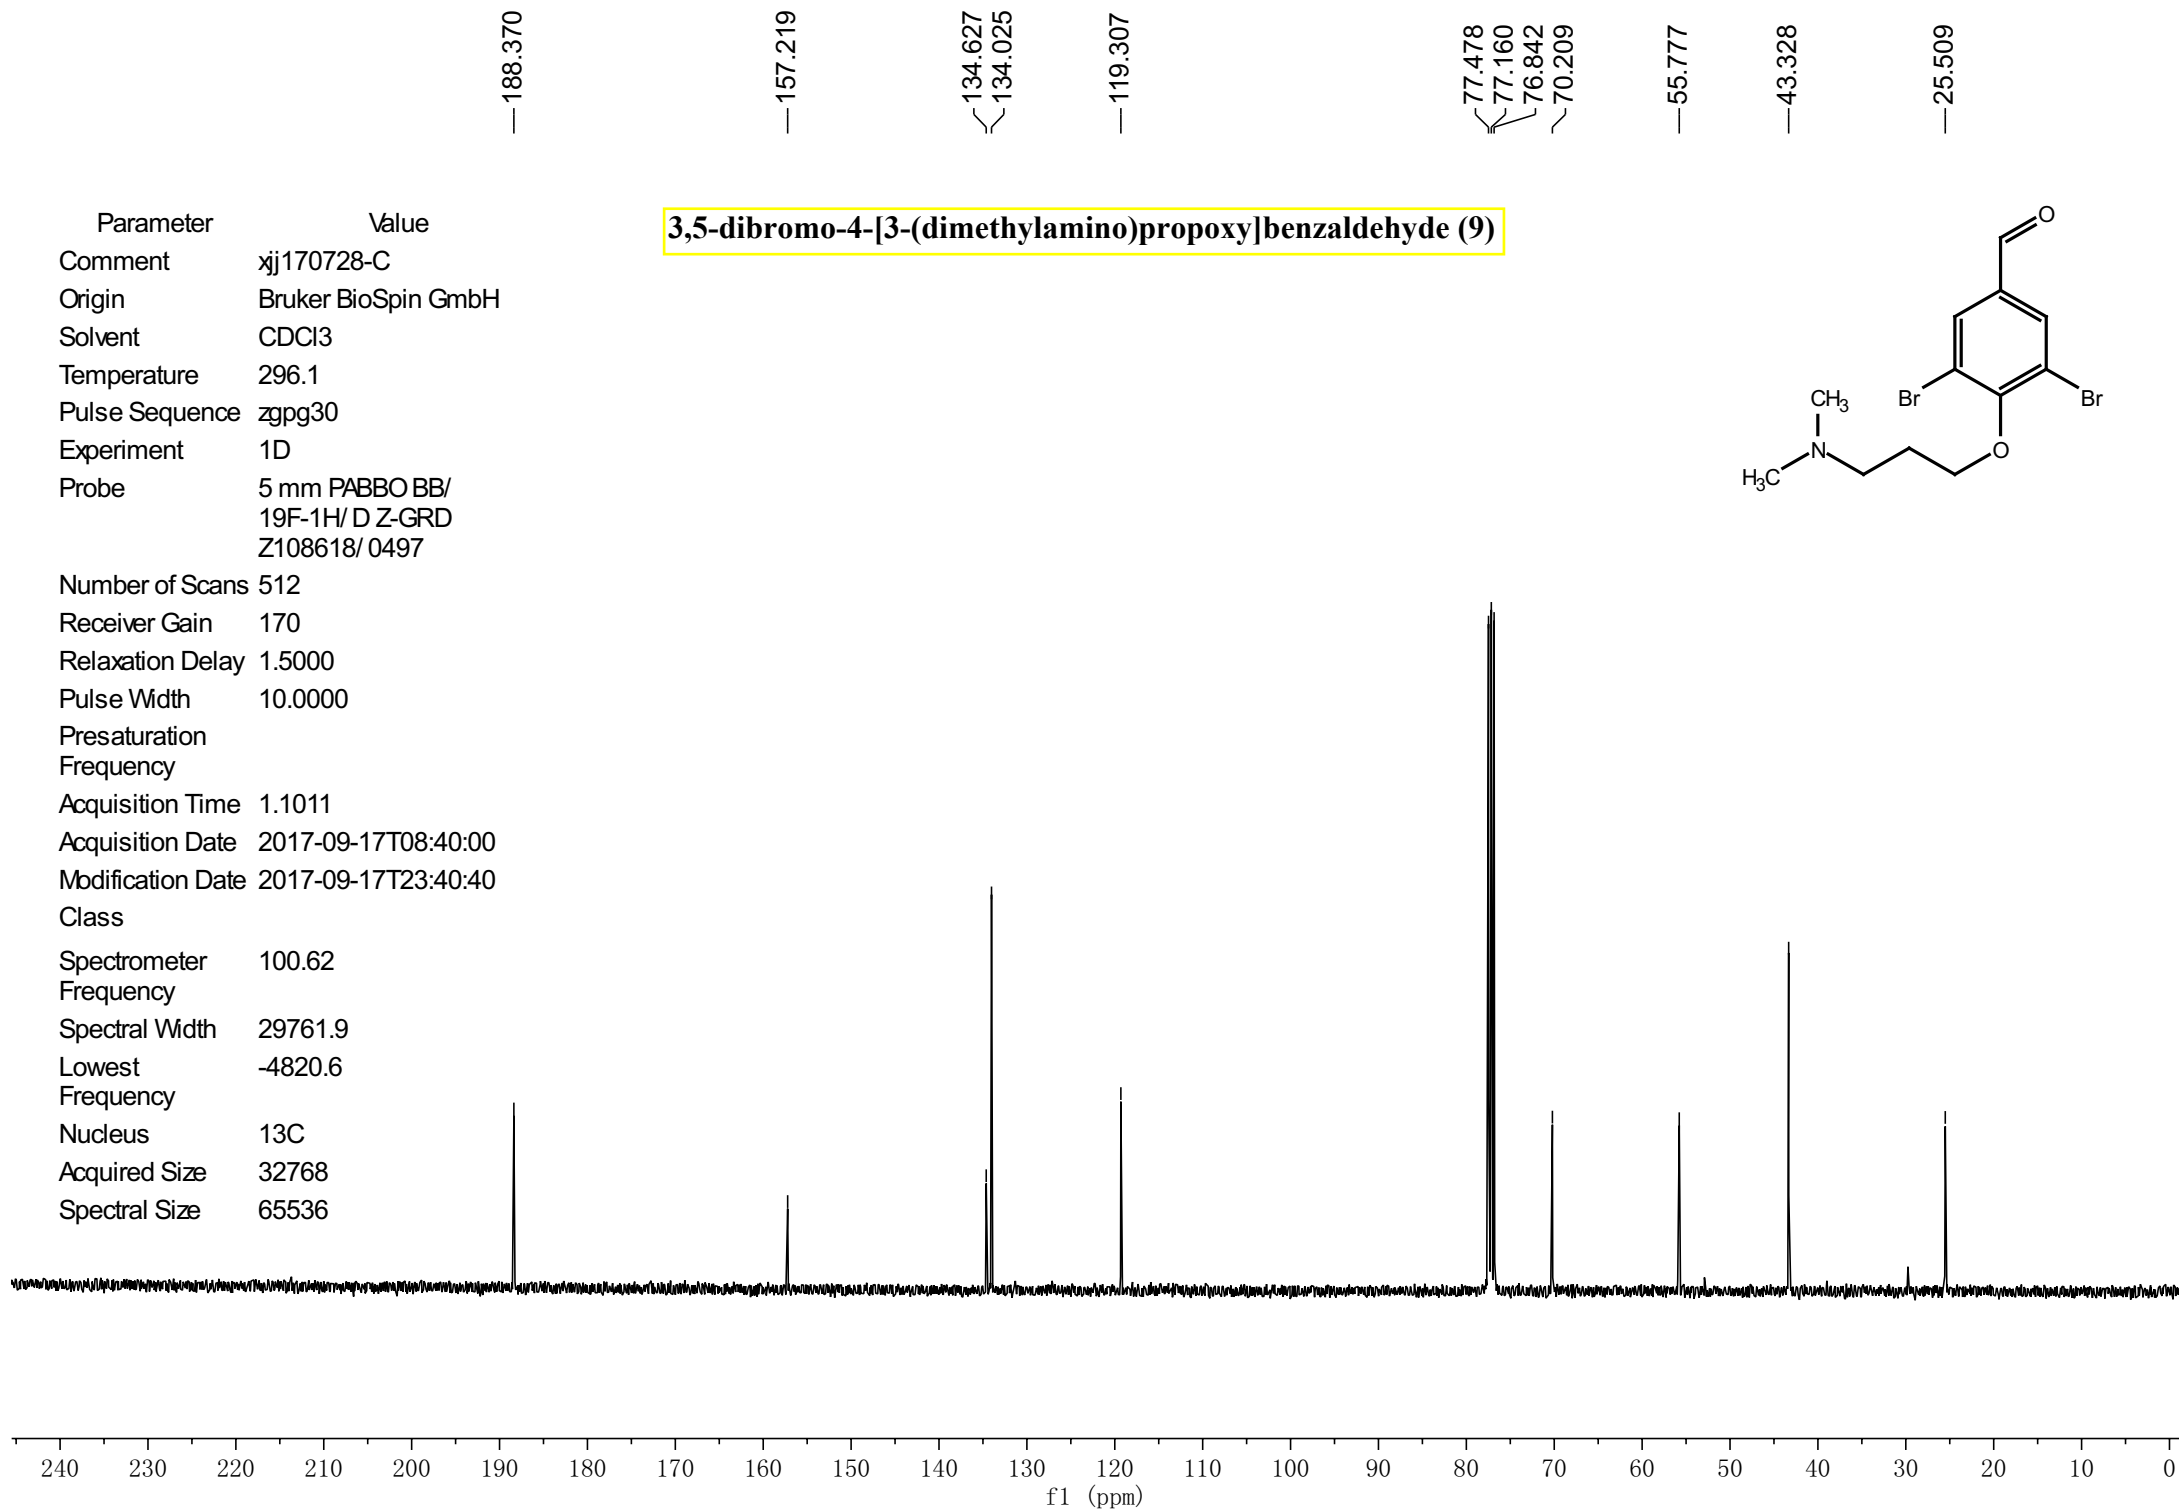

XJJ170717-1

7.800  
7.389  
7.362  
6.484  
6.458  
4.836  
4.166  
4.157  
4.148  
3.520  
3.507  
3.494  
3.312  
3.310  
3.307  
2.962  
2.344  
2.335  
2.325  
2.318  
2.308  
2.299

**(E)-3-[3,5-dibromo-4-(3-(dimethylamino)propoxy)phenyl]acrylic acid (3)**

| Parameter         | Value                                                                            |
|-------------------|----------------------------------------------------------------------------------|
| Comment           | Zhejiang University Agilent<br>600 DD2 Onenmr Sample:<br>XJJ170717-1 in Methanol |
| Origin            | Varian                                                                           |
| Solvent           | cd3od                                                                            |
| Temperature       | 27.0                                                                             |
| Pulse Sequence    | s2pul                                                                            |
| Experiment        | 1D                                                                               |
| Probe             | onenmr                                                                           |
| Number of Scans   | 8                                                                                |
| Receiver Gain     | 30                                                                               |
| Relaxation Delay  | 1.0000                                                                           |
| Pulse Width       | 0.0000                                                                           |
| Acquisition Time  | 1.7039                                                                           |
| Acquisition Date  | 2017-07-21T17:15:58                                                              |
| Modification Date | 2017-07-21T17:16:20                                                              |
| Spectrometer      | 599.77                                                                           |
| Frequency         |                                                                                  |
| Spectral Width    | 9615.4                                                                           |
| Lowest Frequency  | -1209.0                                                                          |
| Nucleus           | 1H                                                                               |
| Acquired Size     | 16384                                                                            |
| Spectral Size     | 65536                                                                            |

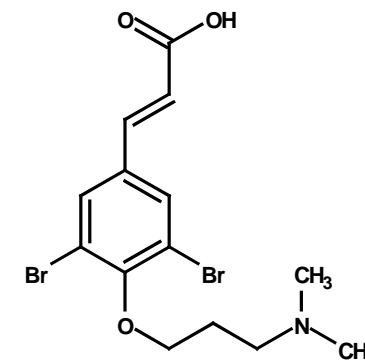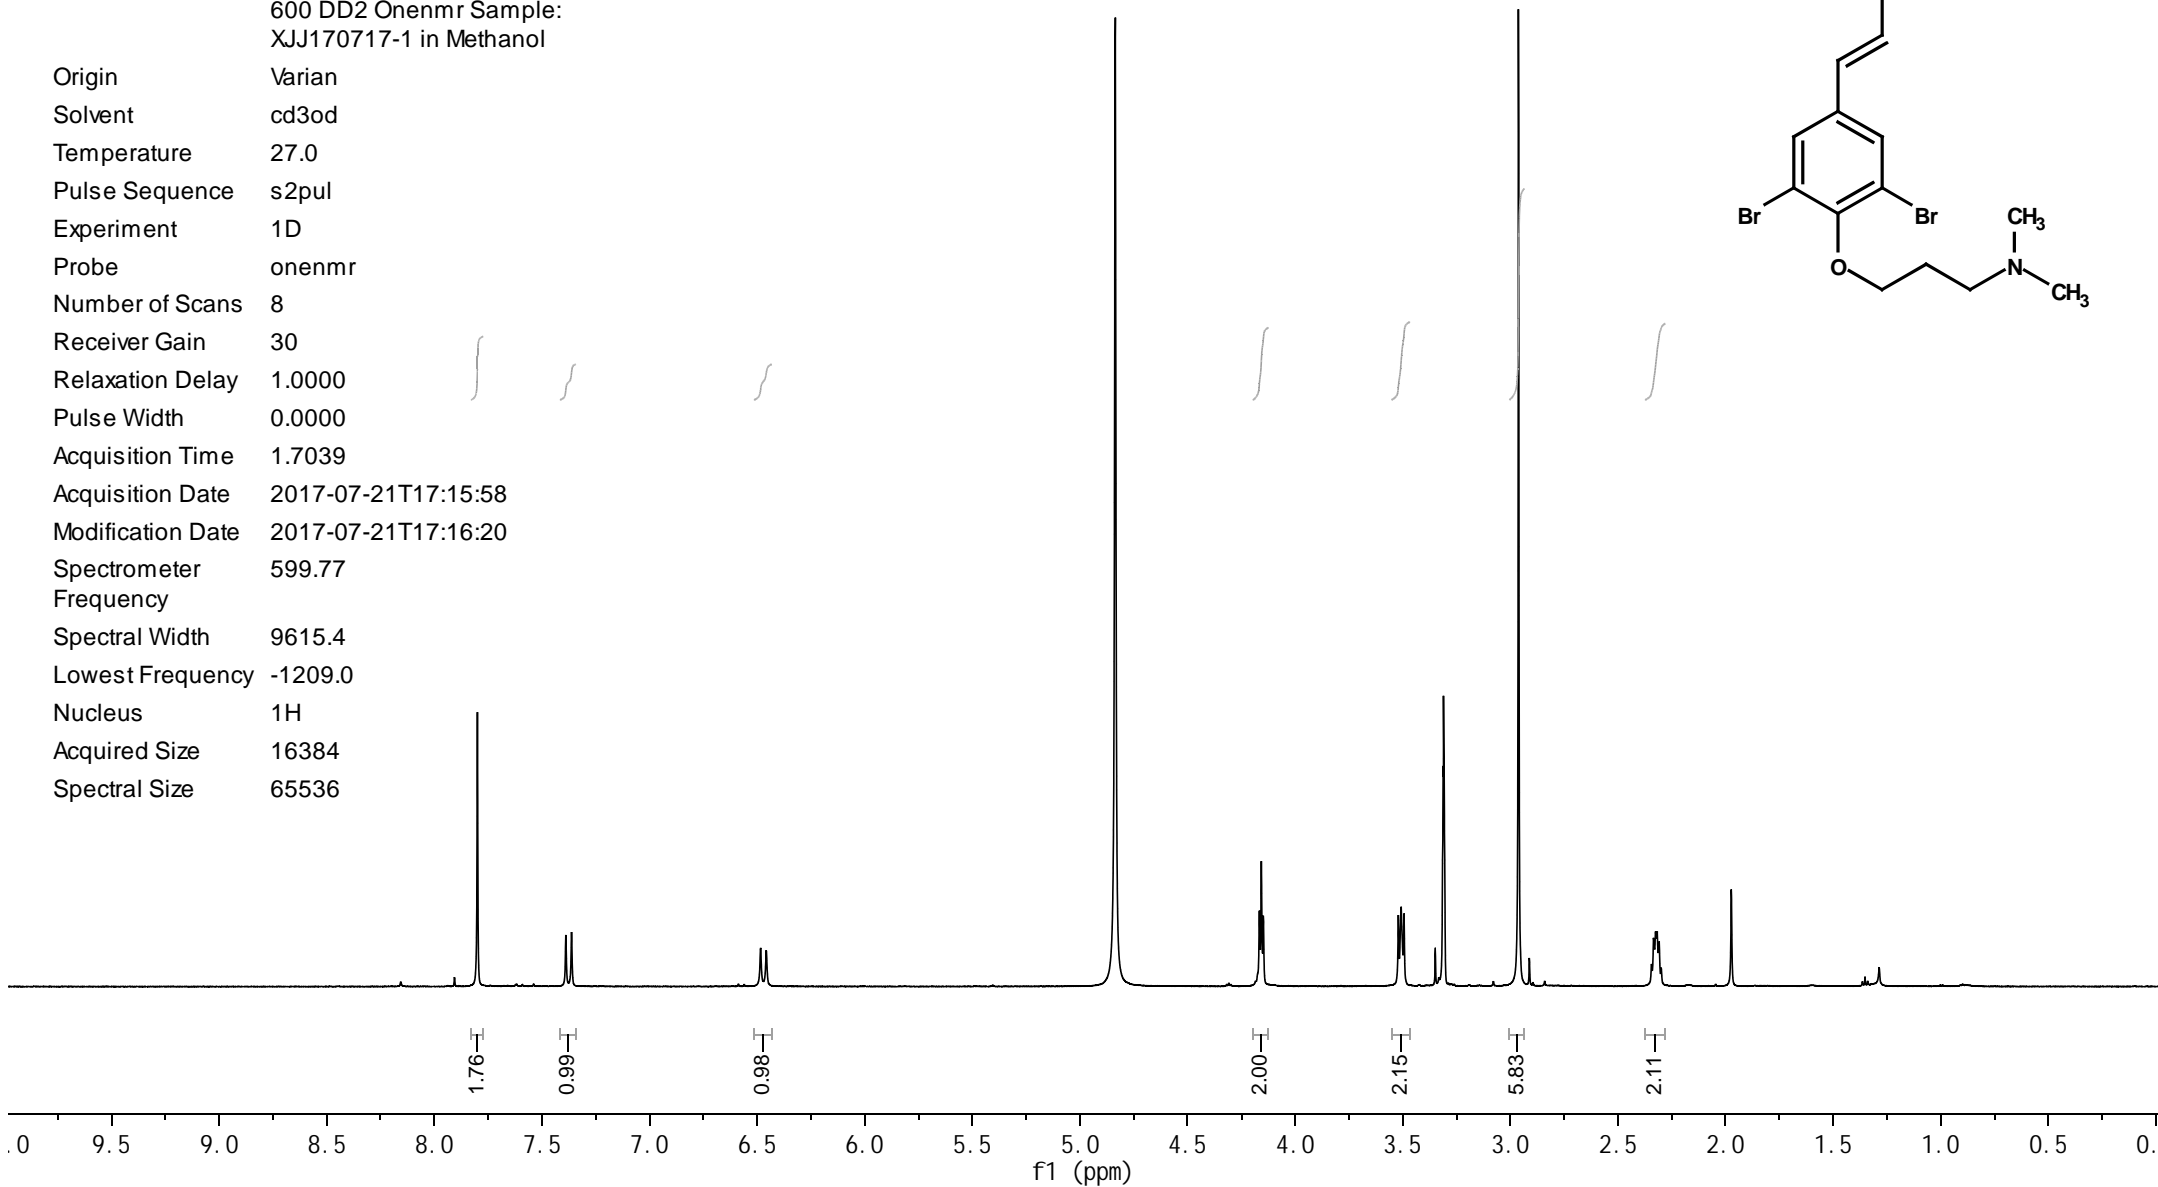

4.166  
4.157  
4.148

3.520  
3.507  
3.494

3.312  
3.310  
3.307

2.962

2.344  
2.335  
2.325  
2.318  
2.308  
2.299

**(E)-3-[3,5-dibromo-4-(3-(dimethylamino)propoxy)phenyl]acrylic acid (3)**

| Parameter         | Value                                                                      |
|-------------------|----------------------------------------------------------------------------|
| Comment           | Zhejiang University Agilent 600 DD2 Onenmr Sample: XJJ170717-1 in Methanol |
| Origin            | Varian                                                                     |
| Solvent           | cd3od                                                                      |
| Temperature       | 27.0                                                                       |
| Pulse Sequence    | s2pul                                                                      |
| Experiment        | 1D                                                                         |
| Probe             | onenmr                                                                     |
| Number of Scans   | 8                                                                          |
| Receiver Gain     | 30                                                                         |
| Relaxation Delay  | 1.0000                                                                     |
| Pulse Width       | 0.0000                                                                     |
| Acquisition Time  | 1.7039                                                                     |
| Acquisition Date  | 2017-07-21T17:15:58                                                        |
| Modification Date | 2017-07-21T17:16:20                                                        |
| Spectrometer      | 599.77                                                                     |
| Frequency         |                                                                            |
| Spectral Width    | 9615.4                                                                     |
| Lowest Frequency  | -1209.0                                                                    |
| Nucleus           | 1H                                                                         |
| Acquired Size     | 16384                                                                      |
| Spectral Size     | 65536                                                                      |

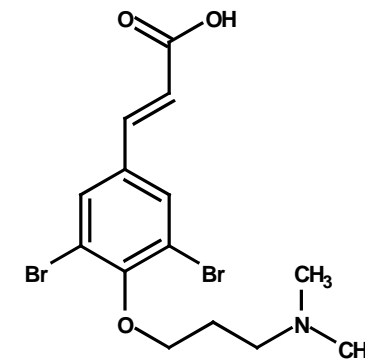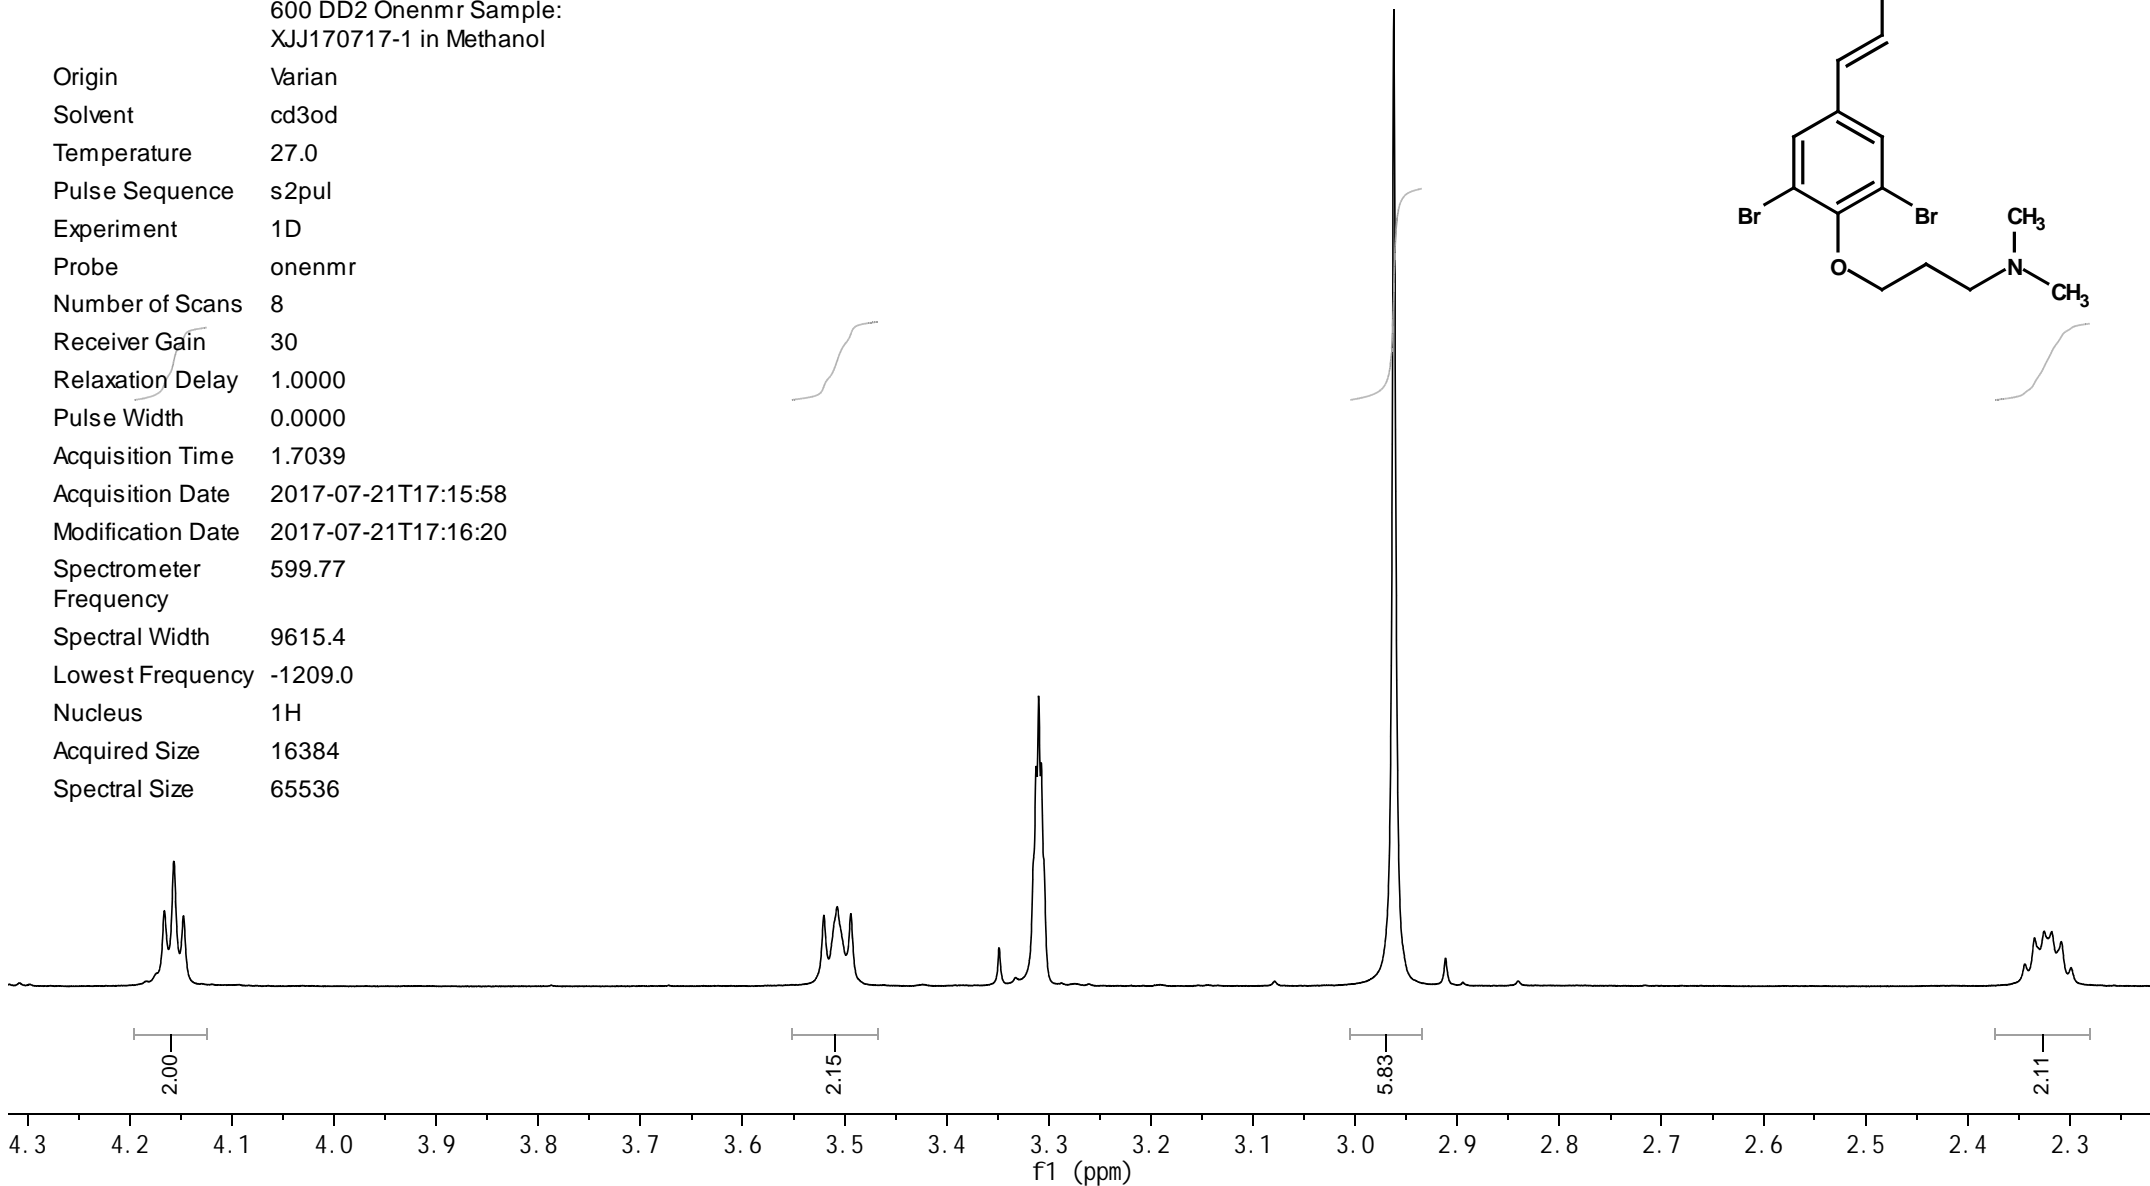

xjj170717-1

—173.216 —154.122 138.720 136.196 132.807 126.918 119.387 —71.280 56.618 49.000 43.539 —26.462

**(E)-3-[3,5-dibromo-4-(3-(dimethylamino)propoxy)phenyl]acrylic acid (3)**

| Parameter         | Value                                              |
|-------------------|----------------------------------------------------|
| Comment           | xjj170717-1c                                       |
| Origin            | Bruker BioSpin GmbH                                |
| Solvent           | MeOD                                               |
| Temperature       | 293.9                                              |
| Pulse Sequence    | zgpg30                                             |
| Experiment        | 1D                                                 |
| Probe             | 5 mm PABBO BB/<br>19F-1H/ D Z-GRD<br>Z108618/ 0497 |
| Number of Scans   | 512                                                |
| Receiver Gain     | 193                                                |
| Relaxation Delay  | 1.5000                                             |
| Pulse Width       | 10.0000                                            |
| Presaturation     |                                                    |
| Frequency         |                                                    |
| Acquisition Time  | 1.1011                                             |
| Acquisition Date  | 2017-09-17T11:06:00                                |
| Modification Date | 2017-09-18T02:06:06                                |
| Class             |                                                    |
| Spectrometer      | 100.62                                             |
| Frequency         |                                                    |
| Spectral Width    | 29761.9                                            |
| Lowest            | -4677.8                                            |
| Frequency         |                                                    |
| Nucleus           | 13C                                                |
| Acquired Size     | 32768                                              |
| Spectral Size     | 65536                                              |

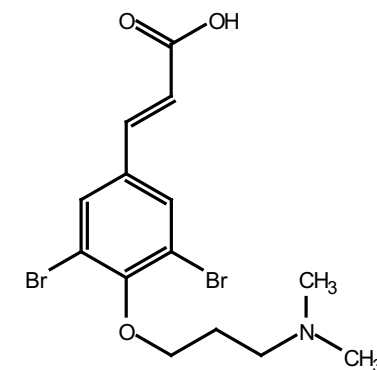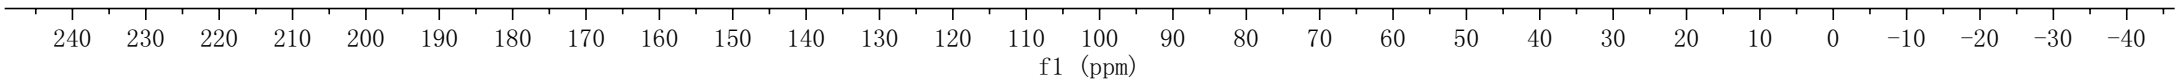



***N,N*-Dimethyltyramine (10)**

9.243

7.003  
7.260  
6.982  
6.684  
6.676  
6.663  
6.656

2.756  
2.738  
2.728  
2.715  
2.627  
2.615  
2.605  
2.587  
2.355

wk110317  
SOLVENT: CDCl3  
Experiment = zg30  
Pulse length = 12.500 usec  
Recycle delay = 1.500 sec  
NA = 8  
PTS1d = 32768  
F1 = 400.130005 MHz  
F2 = 1.000000 MHz  
SW1 = 11990.41 Hz  
AT1 = 2.73 sec  
Hz per Pt 1stD = 0.37 Hz  
SW2 = 1.00 Hz  
Hz per Pt 2ndD = 1.00 Hz  
O1 = 3592.4844 Hz  
O2 = -1.0000 Hz  
LB1 = 0.30 Hz  
TP A = 0.00  
B = 0.00  
C = 0.00

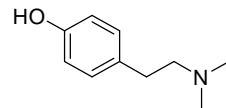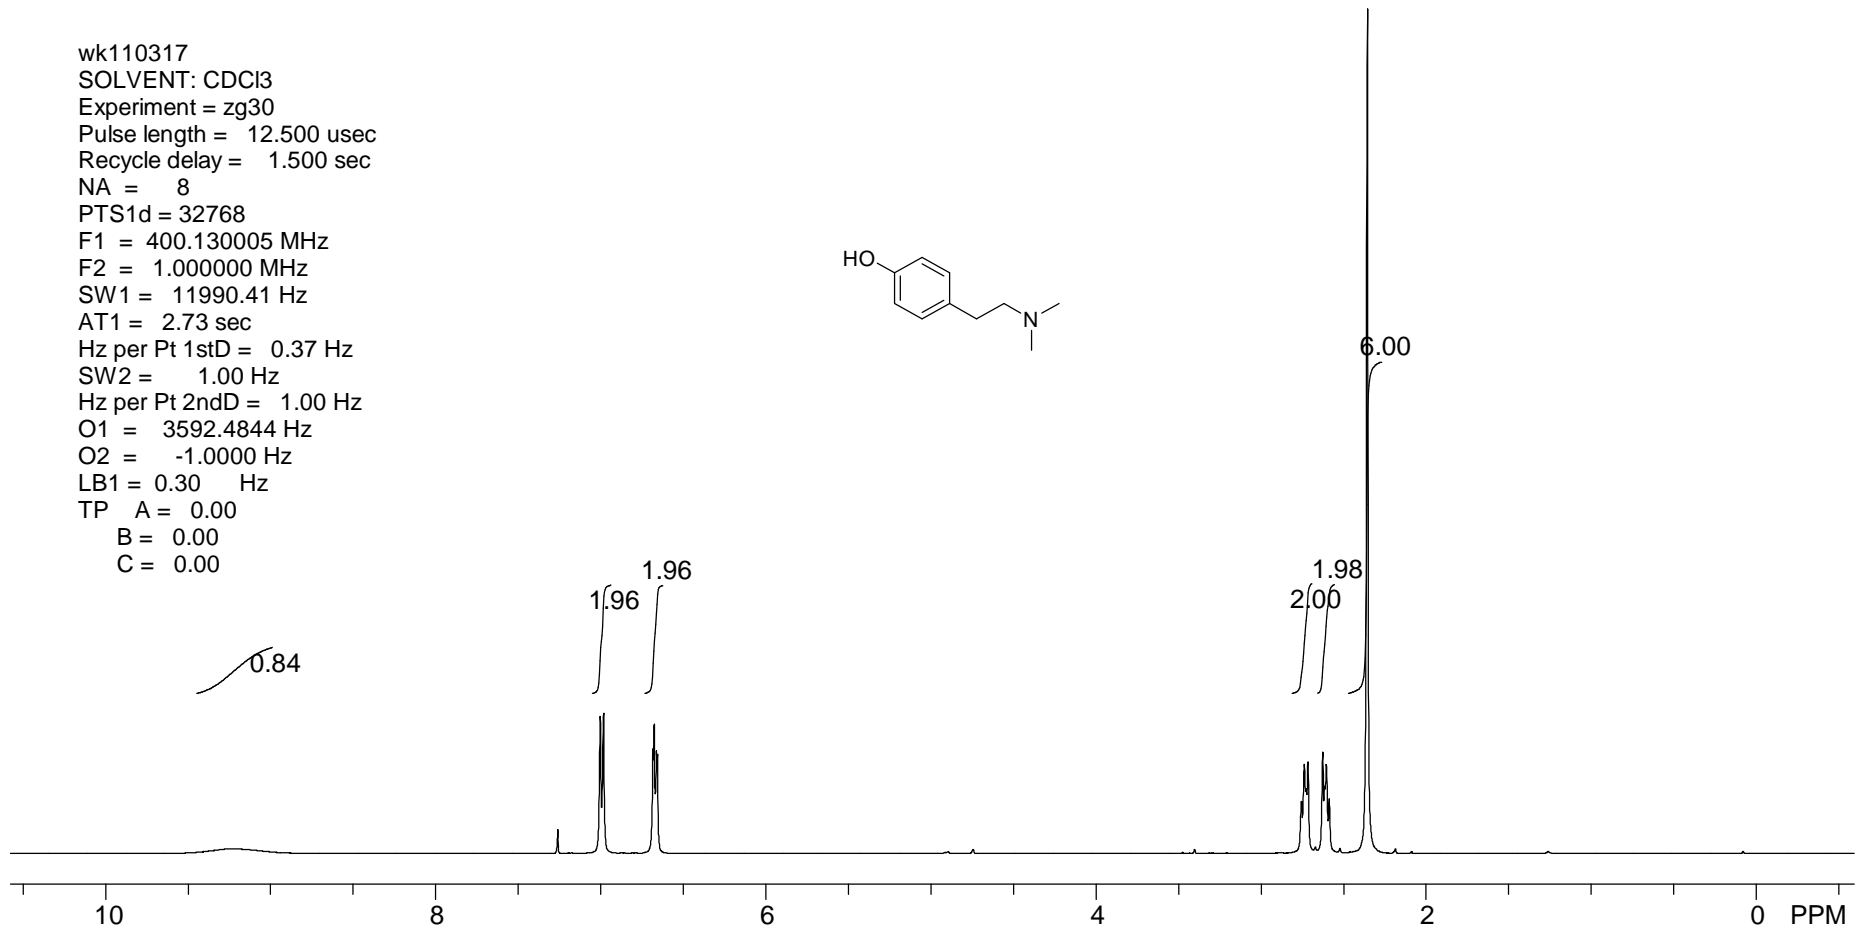

***N,N*-Dimethyltyramine (10)**

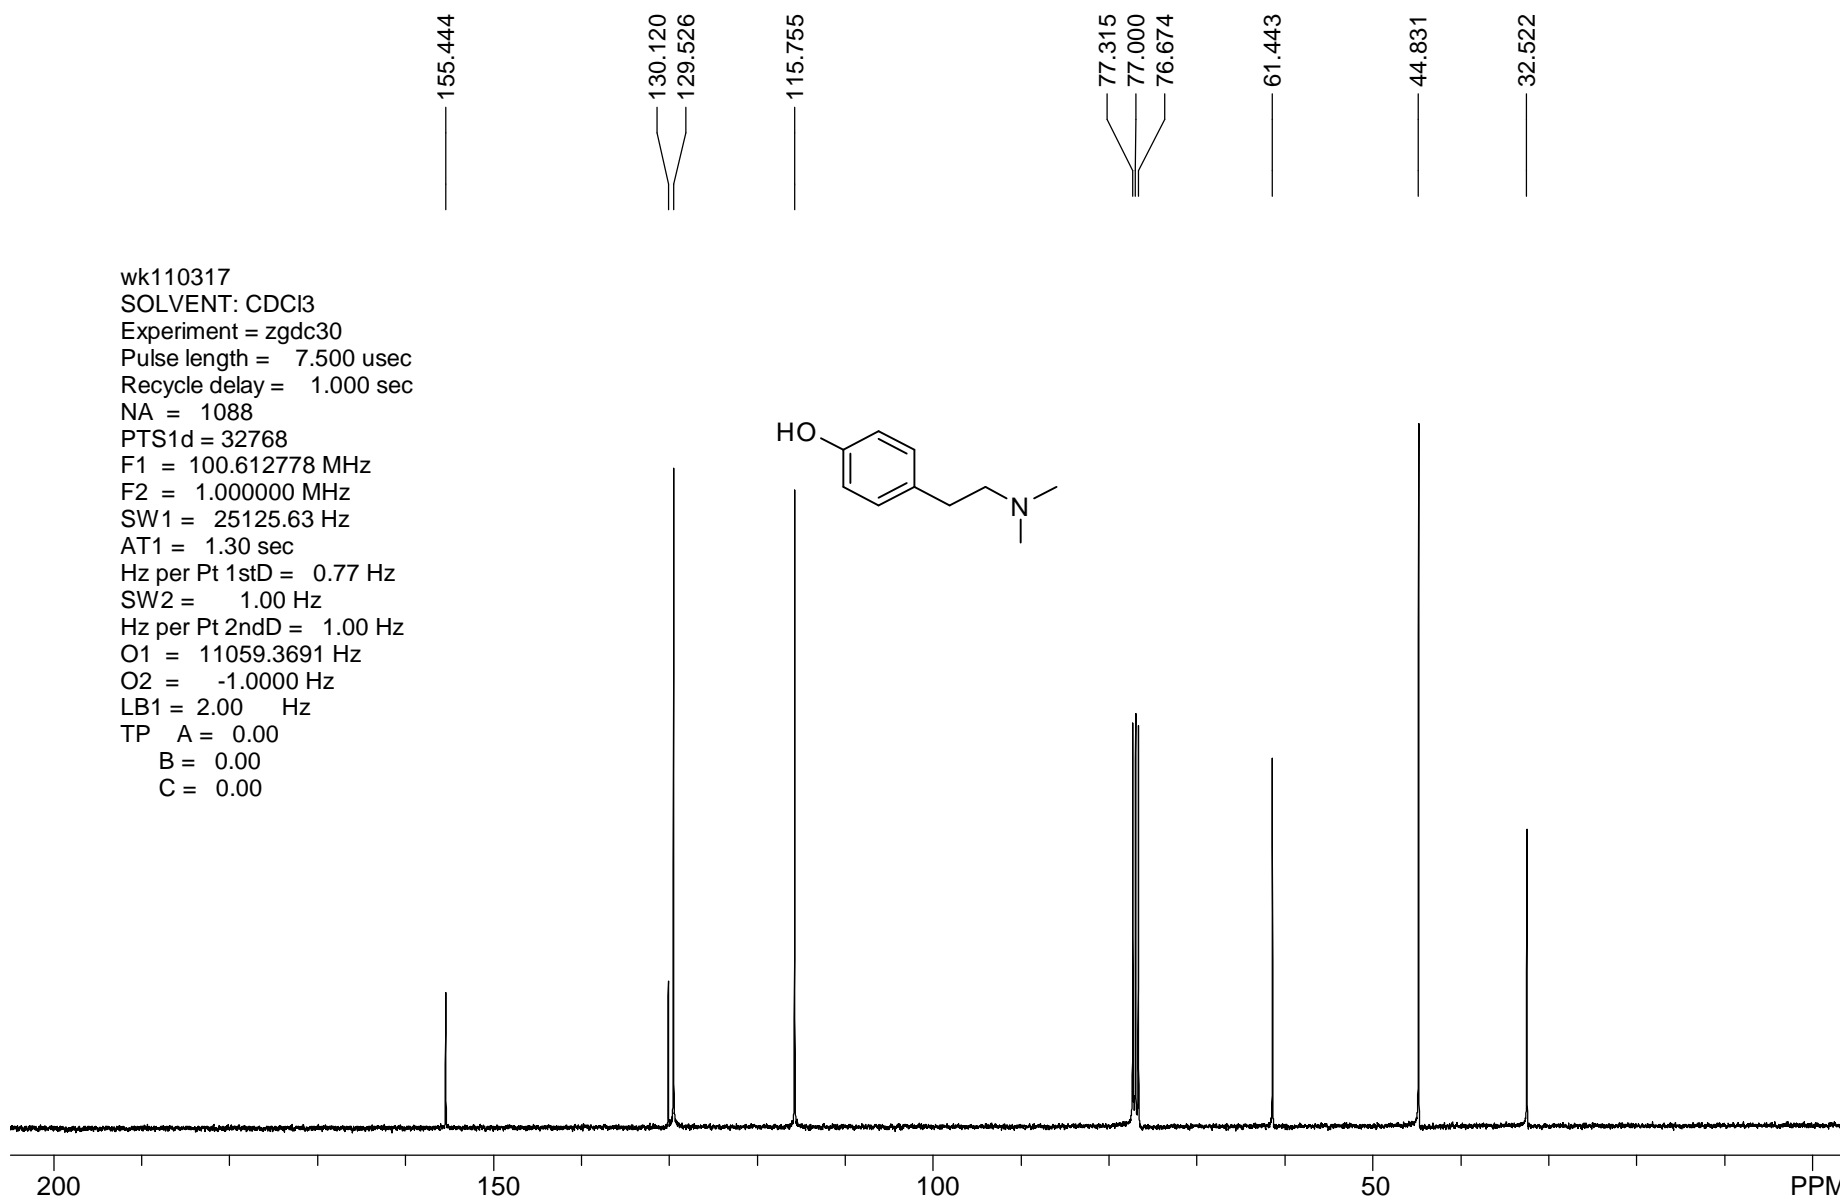

**2,6-dibromo-*N,N*-Dimethyltyramine (11)**

wk110321a-2  
Mar 22 21:05:17 2011  
USER: root  
SOLVENT: DMSO  
Experiment = zg30  
Pulse length = 12.500 usec  
Recycle delay = 1.500 sec  
NA = 8  
PTS1d = 32768  
F1 = 400.130005 MHz  
F2 = 1.000000 MHz  
SW1 = 11990.41 Hz  
AT1 = 2.73 sec  
Hz per Pt 1stD = 0.37 Hz  
SW2 = 1.00 Hz  
Hz per Pt 2ndD = 1.00 Hz  
O1 = 3599.0903 Hz  
O2 = -1.0000 Hz  
LB1 = 0.30 Hz  
TP A = 0.00  
B = 0.00  
C = 0.00

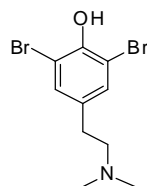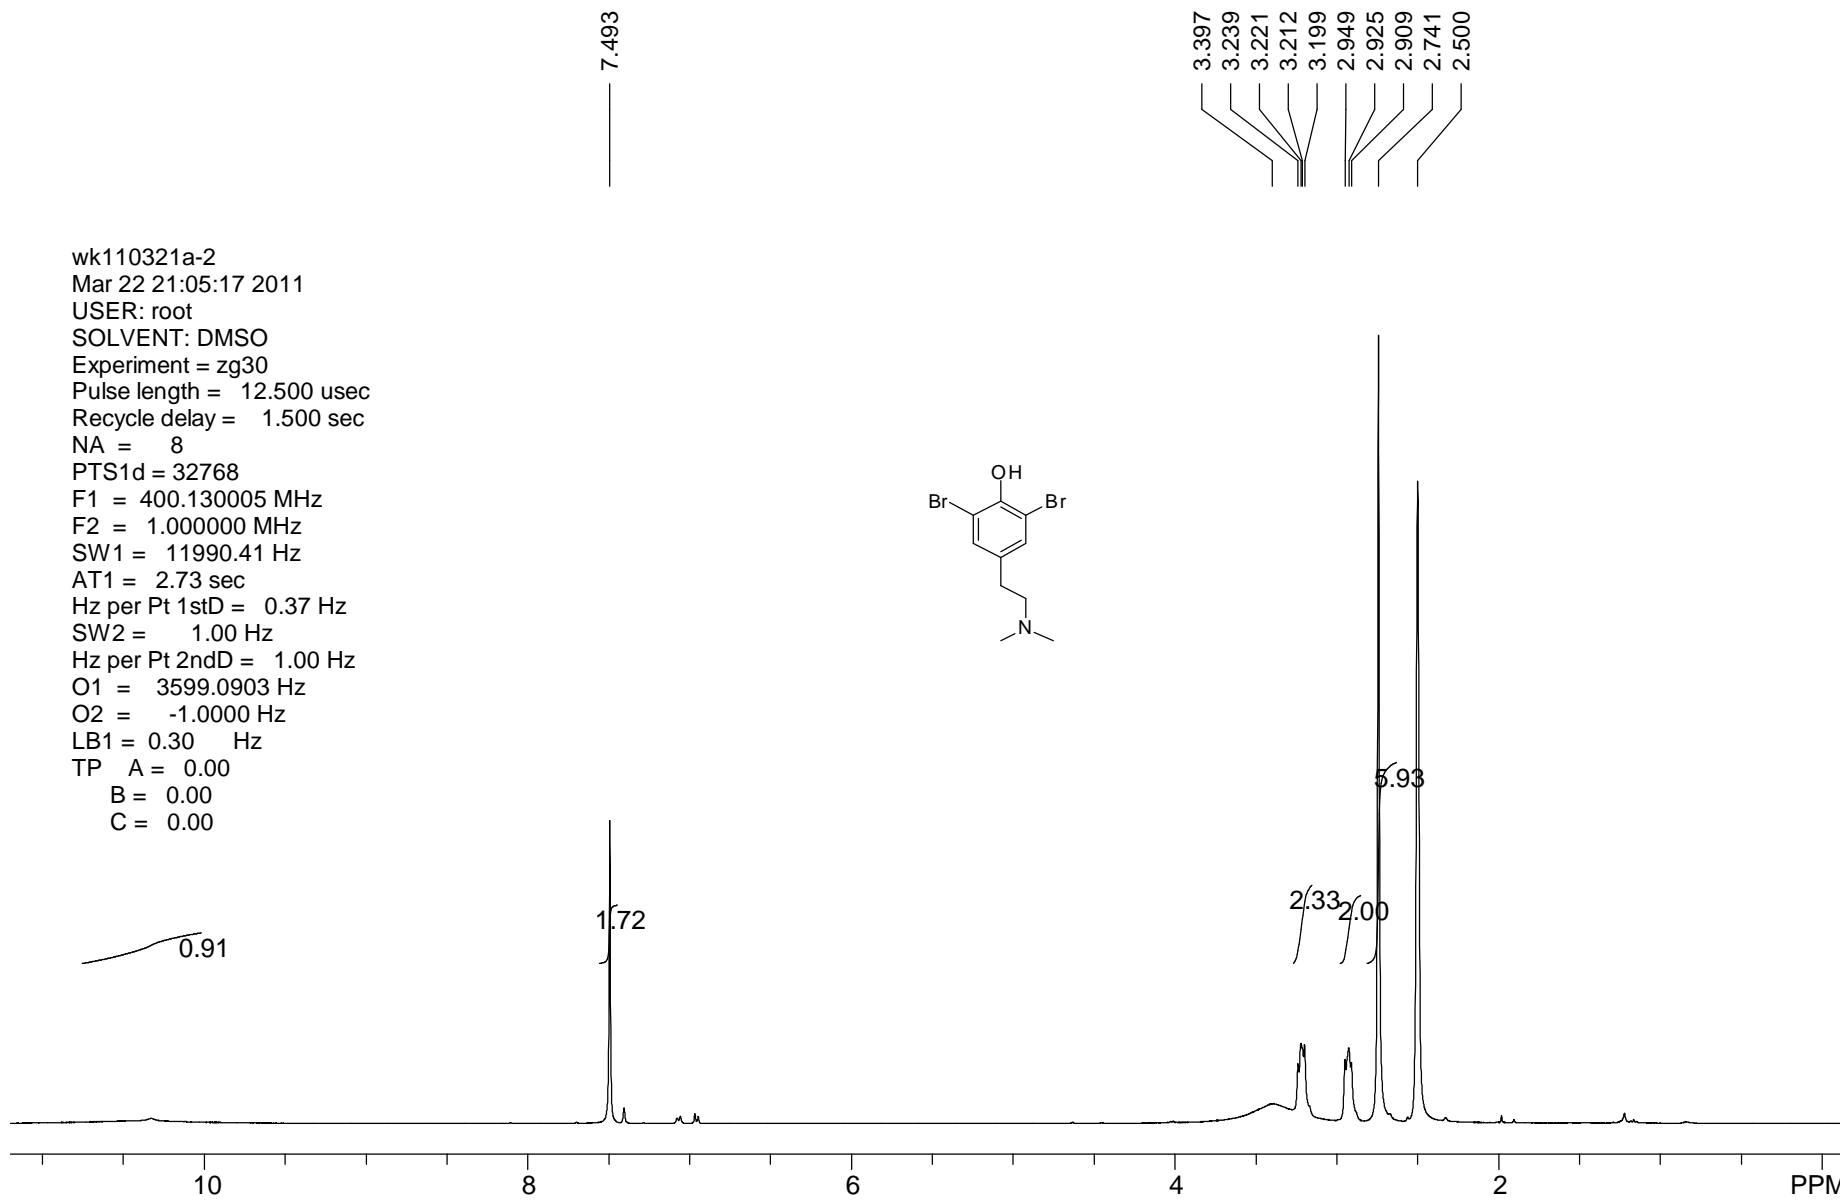

2,6-dibromo-*N,N*-Dimethyltyramine (11)

3.397  
3.239  
3.221  
3.212  
3.199  
2.949  
2.925  
2.909  
2.741  
2.500

wk110321a-2  
Mar 22 21:05:17 2011  
USER: root  
SOLVENT: DMSO  
Experiment = zg30  
Pulse length = 12.500 usec  
Recycle delay = 1.500 sec  
NA = 8  
PTS1d = 32768  
F1 = 400.130005 MHz  
F2 = 1.000000 MHz  
SW1 = 11990.41 Hz  
AT1 = 2.73 sec  
Hz per Pt 1stD = 0.37 Hz  
SW2 = 1.00 Hz  
Hz per Pt 2ndD = 1.00 Hz  
O1 = 3599.0903 Hz  
O2 = -1.0000 Hz  
LB1 = 0.30 Hz  
TP A = 0.00  
B = 0.00  
C = 0.00

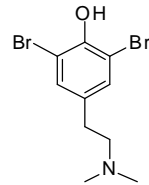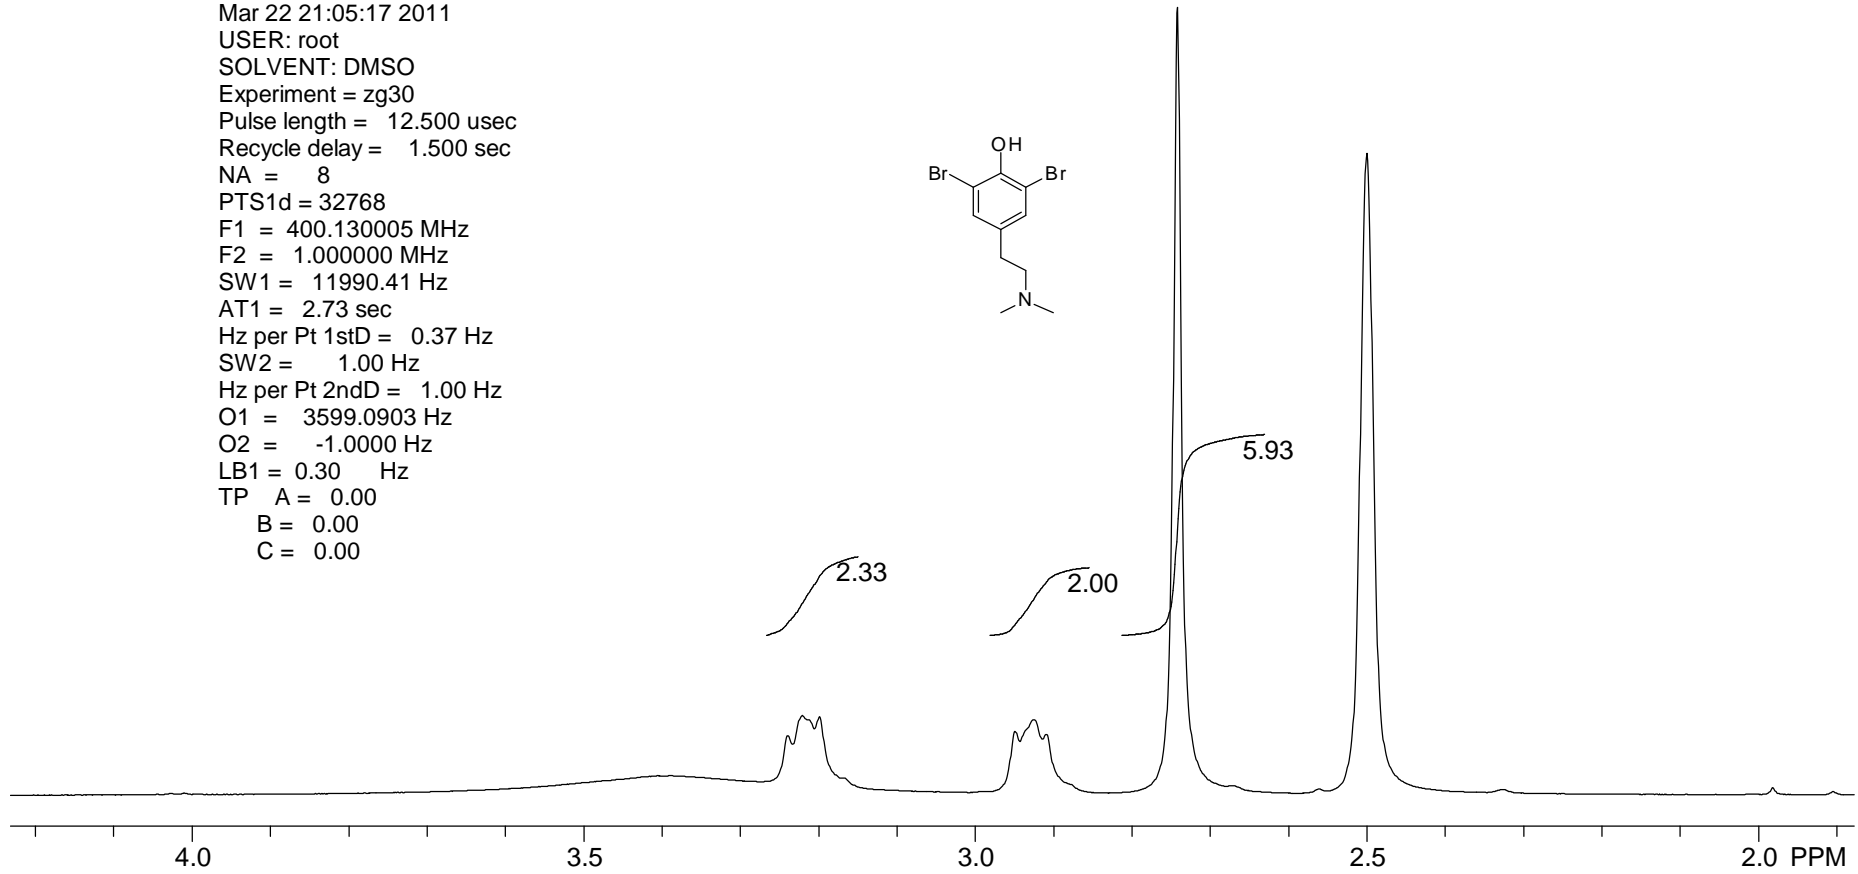

XJJ170721

— 151.691

— 133.753  
— 131.272

— 112.520

— 59.471

49.213  
49.000  
48.787  
43.630

— 30.122

**2,6-dibromo-*N,N*-Dimethyltyramine (11)**

| Parameter      | Value                                              |
|----------------|----------------------------------------------------|
| Comment        | xjj170721-C                                        |
| Origin         | Bruker BioSpin GmbH                                |
| Solvent        | MeOD                                               |
| Temperature    | 295.1                                              |
| Pulse Sequence | zgpg30                                             |
| Experiment     | 1D                                                 |
| Probe          | 5 mm PABBO BB/<br>19F-1H/ D Z-GRD<br>Z108618/ 0497 |

|                   |                     |
|-------------------|---------------------|
| Number of Scans   | 512                 |
| Receiver Gain     | 193                 |
| Relaxation Delay  | 1.5000              |
| Pulse Width       | 10.0000             |
| Presaturation     |                     |
| Frequency         |                     |
| Acquisition Time  | 1.1011              |
| Acquisition Date  | 2017-09-17T09:34:00 |
| Modification Date | 2017-09-18T00:34:42 |

|                |         |
|----------------|---------|
| Class          |         |
| Spectrometer   | 100.62  |
| Frequency      |         |
| Spectral Width | 29761.9 |
| Lowest         | -4677.8 |
| Frequency      |         |
| Nucleus        | 13C     |
| Acquired Size  | 32768   |
| Spectral Size  | 65536   |

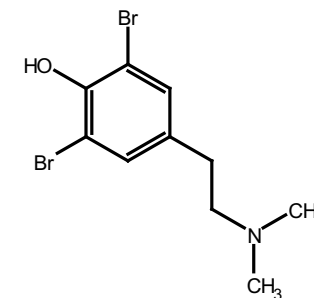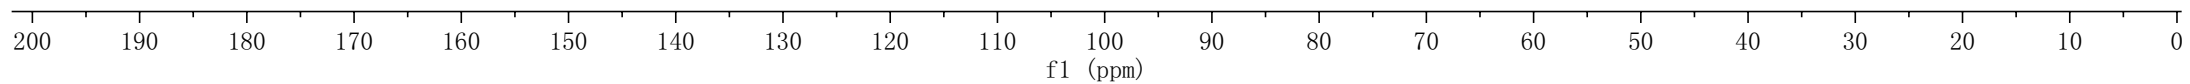

XJJ170407

**{3-[2,6-Dibromo-4-(2-dimethylamino-ethyl)phenoxy]propyl}carbamic acid *tert*-butyl ester (12)**

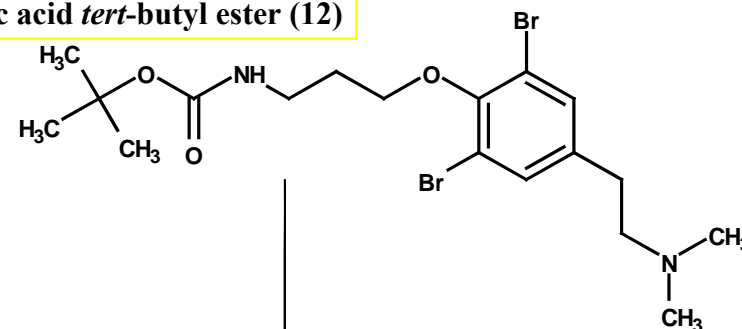

| Parameter         | Value                                                                     |
|-------------------|---------------------------------------------------------------------------|
| Comment           | Zhejiang University Agilent 600 DD2 Onenmr Sample: LXJJ170407 in Methanol |
| Origin            | Varian                                                                    |
| Solvent           | cd3od                                                                     |
| Temperature       | 27.0                                                                      |
| Pulse Sequence    | s2pul                                                                     |
| Experiment        | 1D                                                                        |
| Probe             | onenmr                                                                    |
| Number of Scans   | 8                                                                         |
| Receiver Gain     | 30                                                                        |
| Relaxation Delay  | 1.0000                                                                    |
| Pulse Width       | 0.0000                                                                    |
| Acquisition Time  | 1.7039                                                                    |
| Acquisition Date  | 2017-07-28T16:49:14                                                       |
| Modification Date | 2017-07-28T16:49:38                                                       |
| Class             |                                                                           |
| Spectrometer      | 599.77                                                                    |
| Frequency         |                                                                           |
| Spectral Width    | 9615.4                                                                    |
| Lowest Frequency  | -1209.0                                                                   |
| Nucleus           | 1H                                                                        |
| Acquired Size     | 16384                                                                     |
| Spectral Size     | 65536                                                                     |

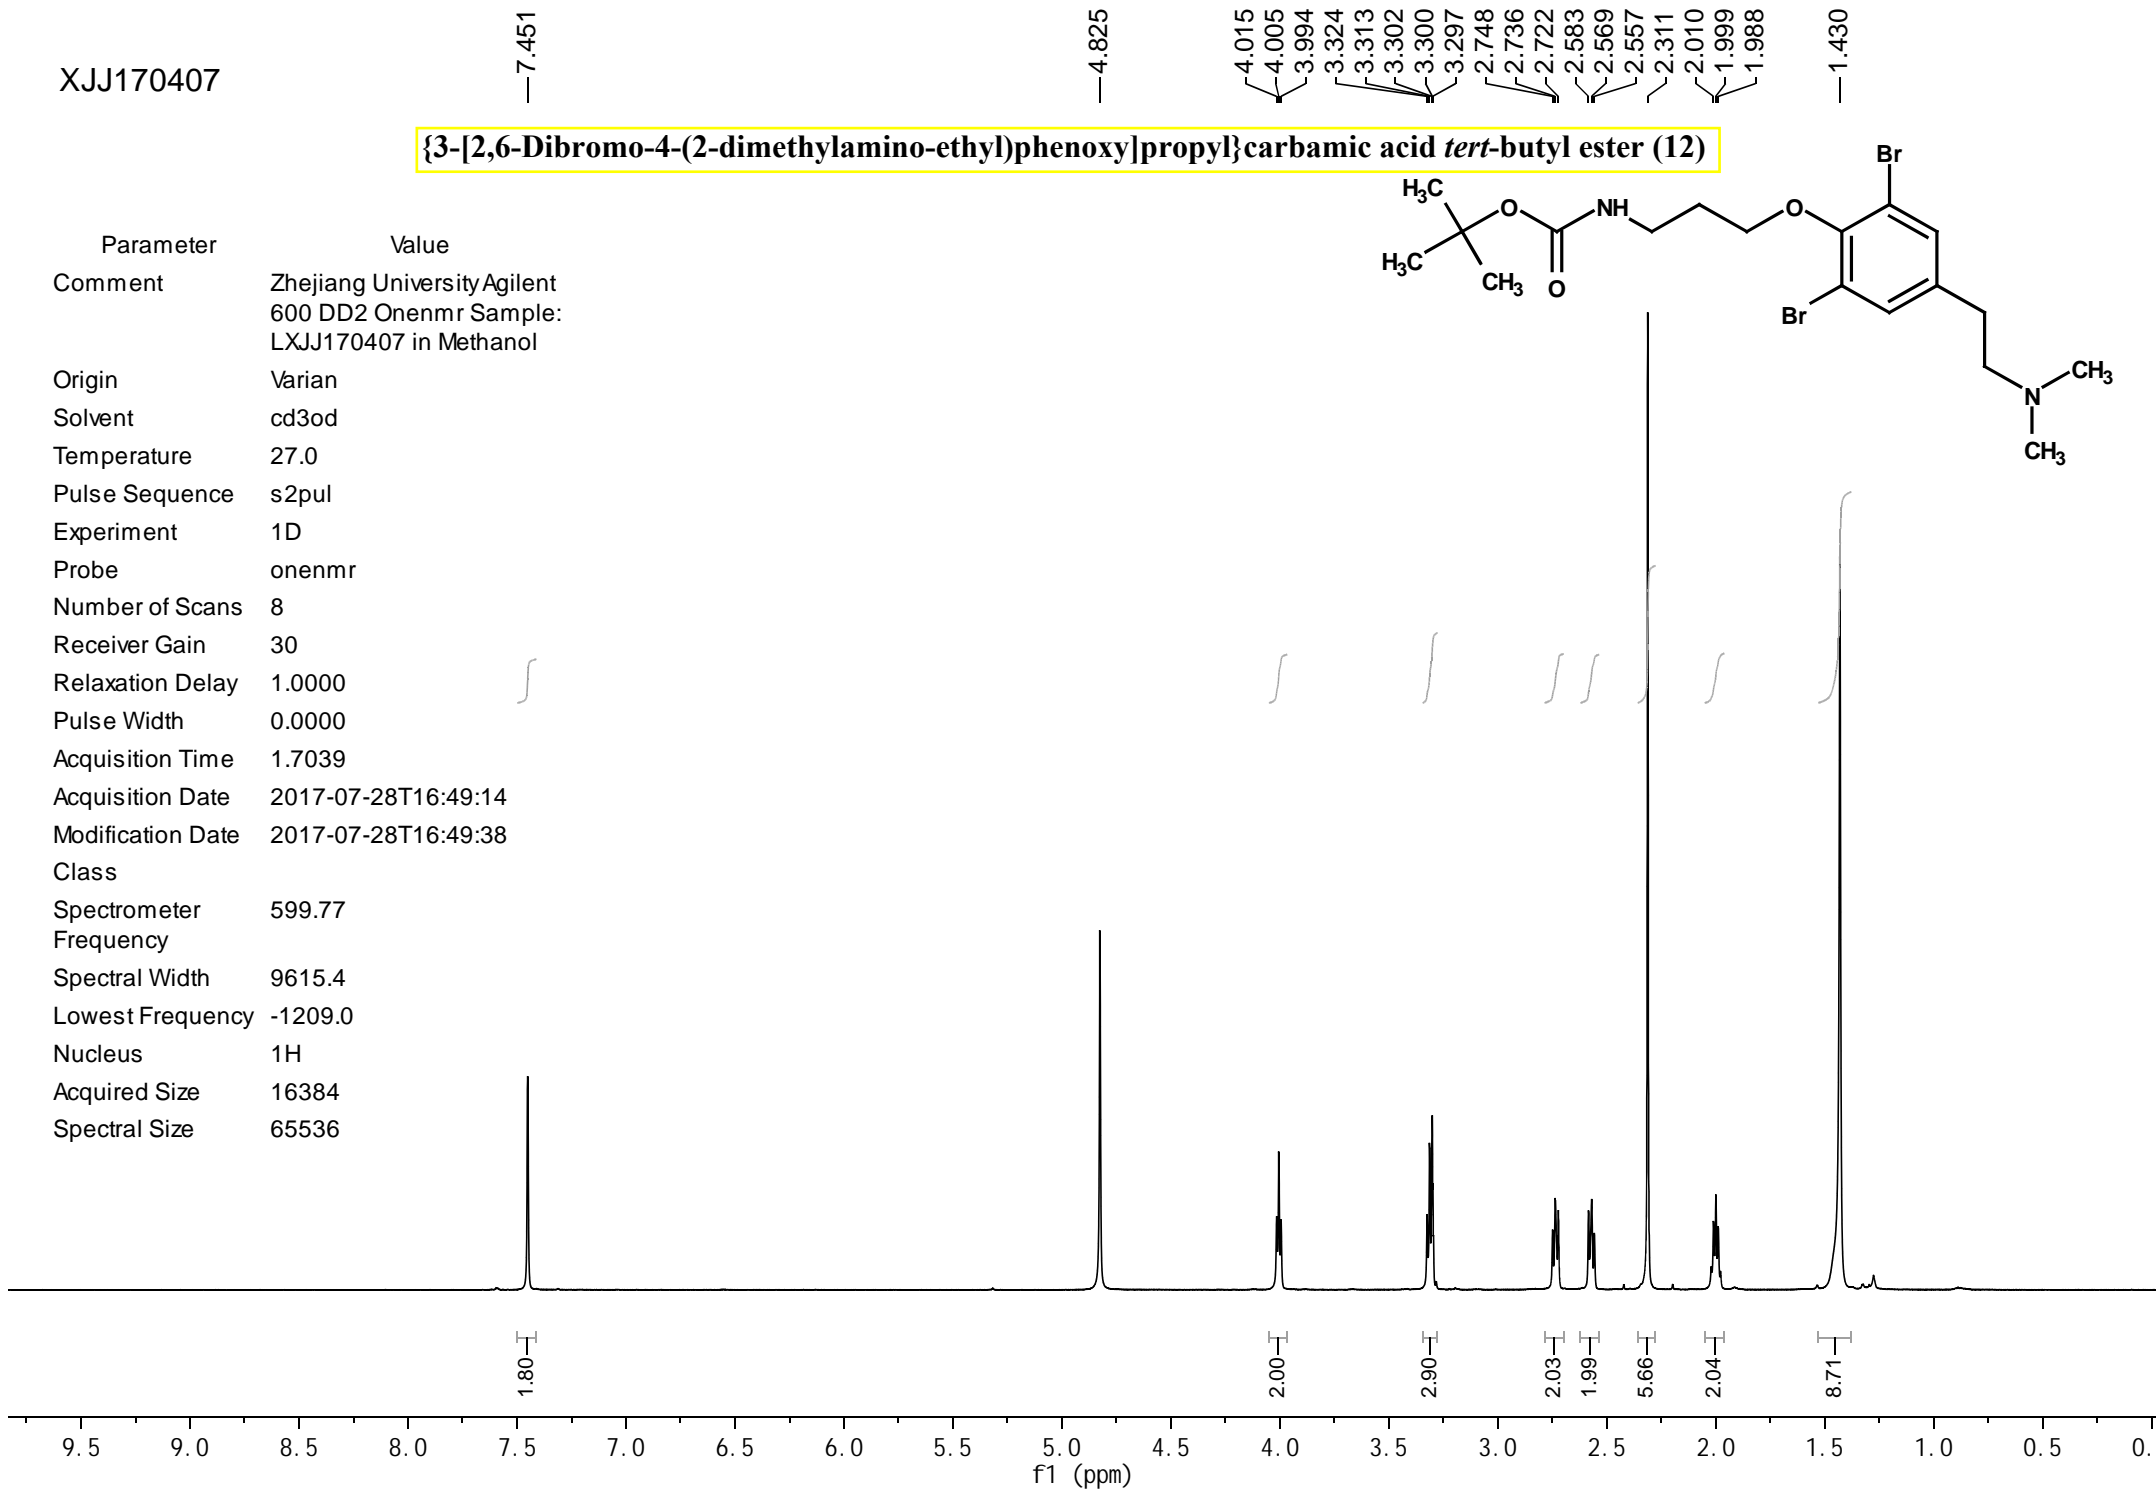

| Parameter         | Value                                                                           |
|-------------------|---------------------------------------------------------------------------------|
| Comment           | Zhejiang University Agilent<br>600 DD2 Onenmr Sample:<br>LXJJ170407 in Methanol |
| Origin            | Varian                                                                          |
| Solvent           | cd3od                                                                           |
| Temperature       | 27.0                                                                            |
| Pulse Sequence    | s2pul                                                                           |
| Experiment        | 1D                                                                              |
| Probe             | onenmr                                                                          |
| Number of Scans   | 8                                                                               |
| Receiver Gain     | 30                                                                              |
| Relaxation Delay  | 1.0000                                                                          |
| Pulse Width       | 0.0000                                                                          |
| Acquisition Time  | 1.7039                                                                          |
| Acquisition Date  | 2017-07-28T16:49:14                                                             |
| Modification Date | 2017-07-28T16:49:38                                                             |
| Class             |                                                                                 |
| Spectrometer      | 599.77                                                                          |
| Frequency         |                                                                                 |
| Spectral Width    | 9615.4                                                                          |
| Lowest Frequency  | -1209.0                                                                         |
| Nucleus           | 1H                                                                              |
| Acquired Size     | 16384                                                                           |
| Spectral Size     | 65536                                                                           |

**{3-[2,6-Dibromo-4-(2-dimethylamino-ethyl)phenoxy]propyl}carbamic acid *tert*-butyl ester (12)**

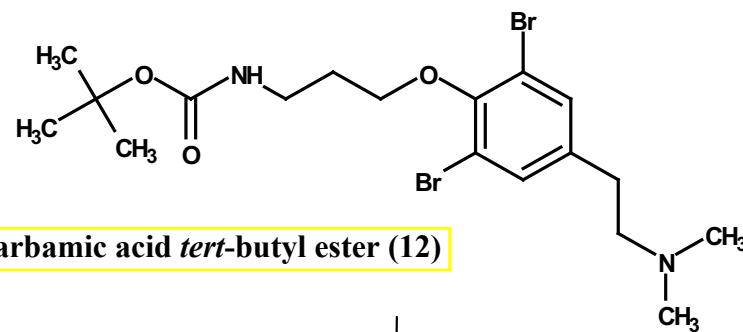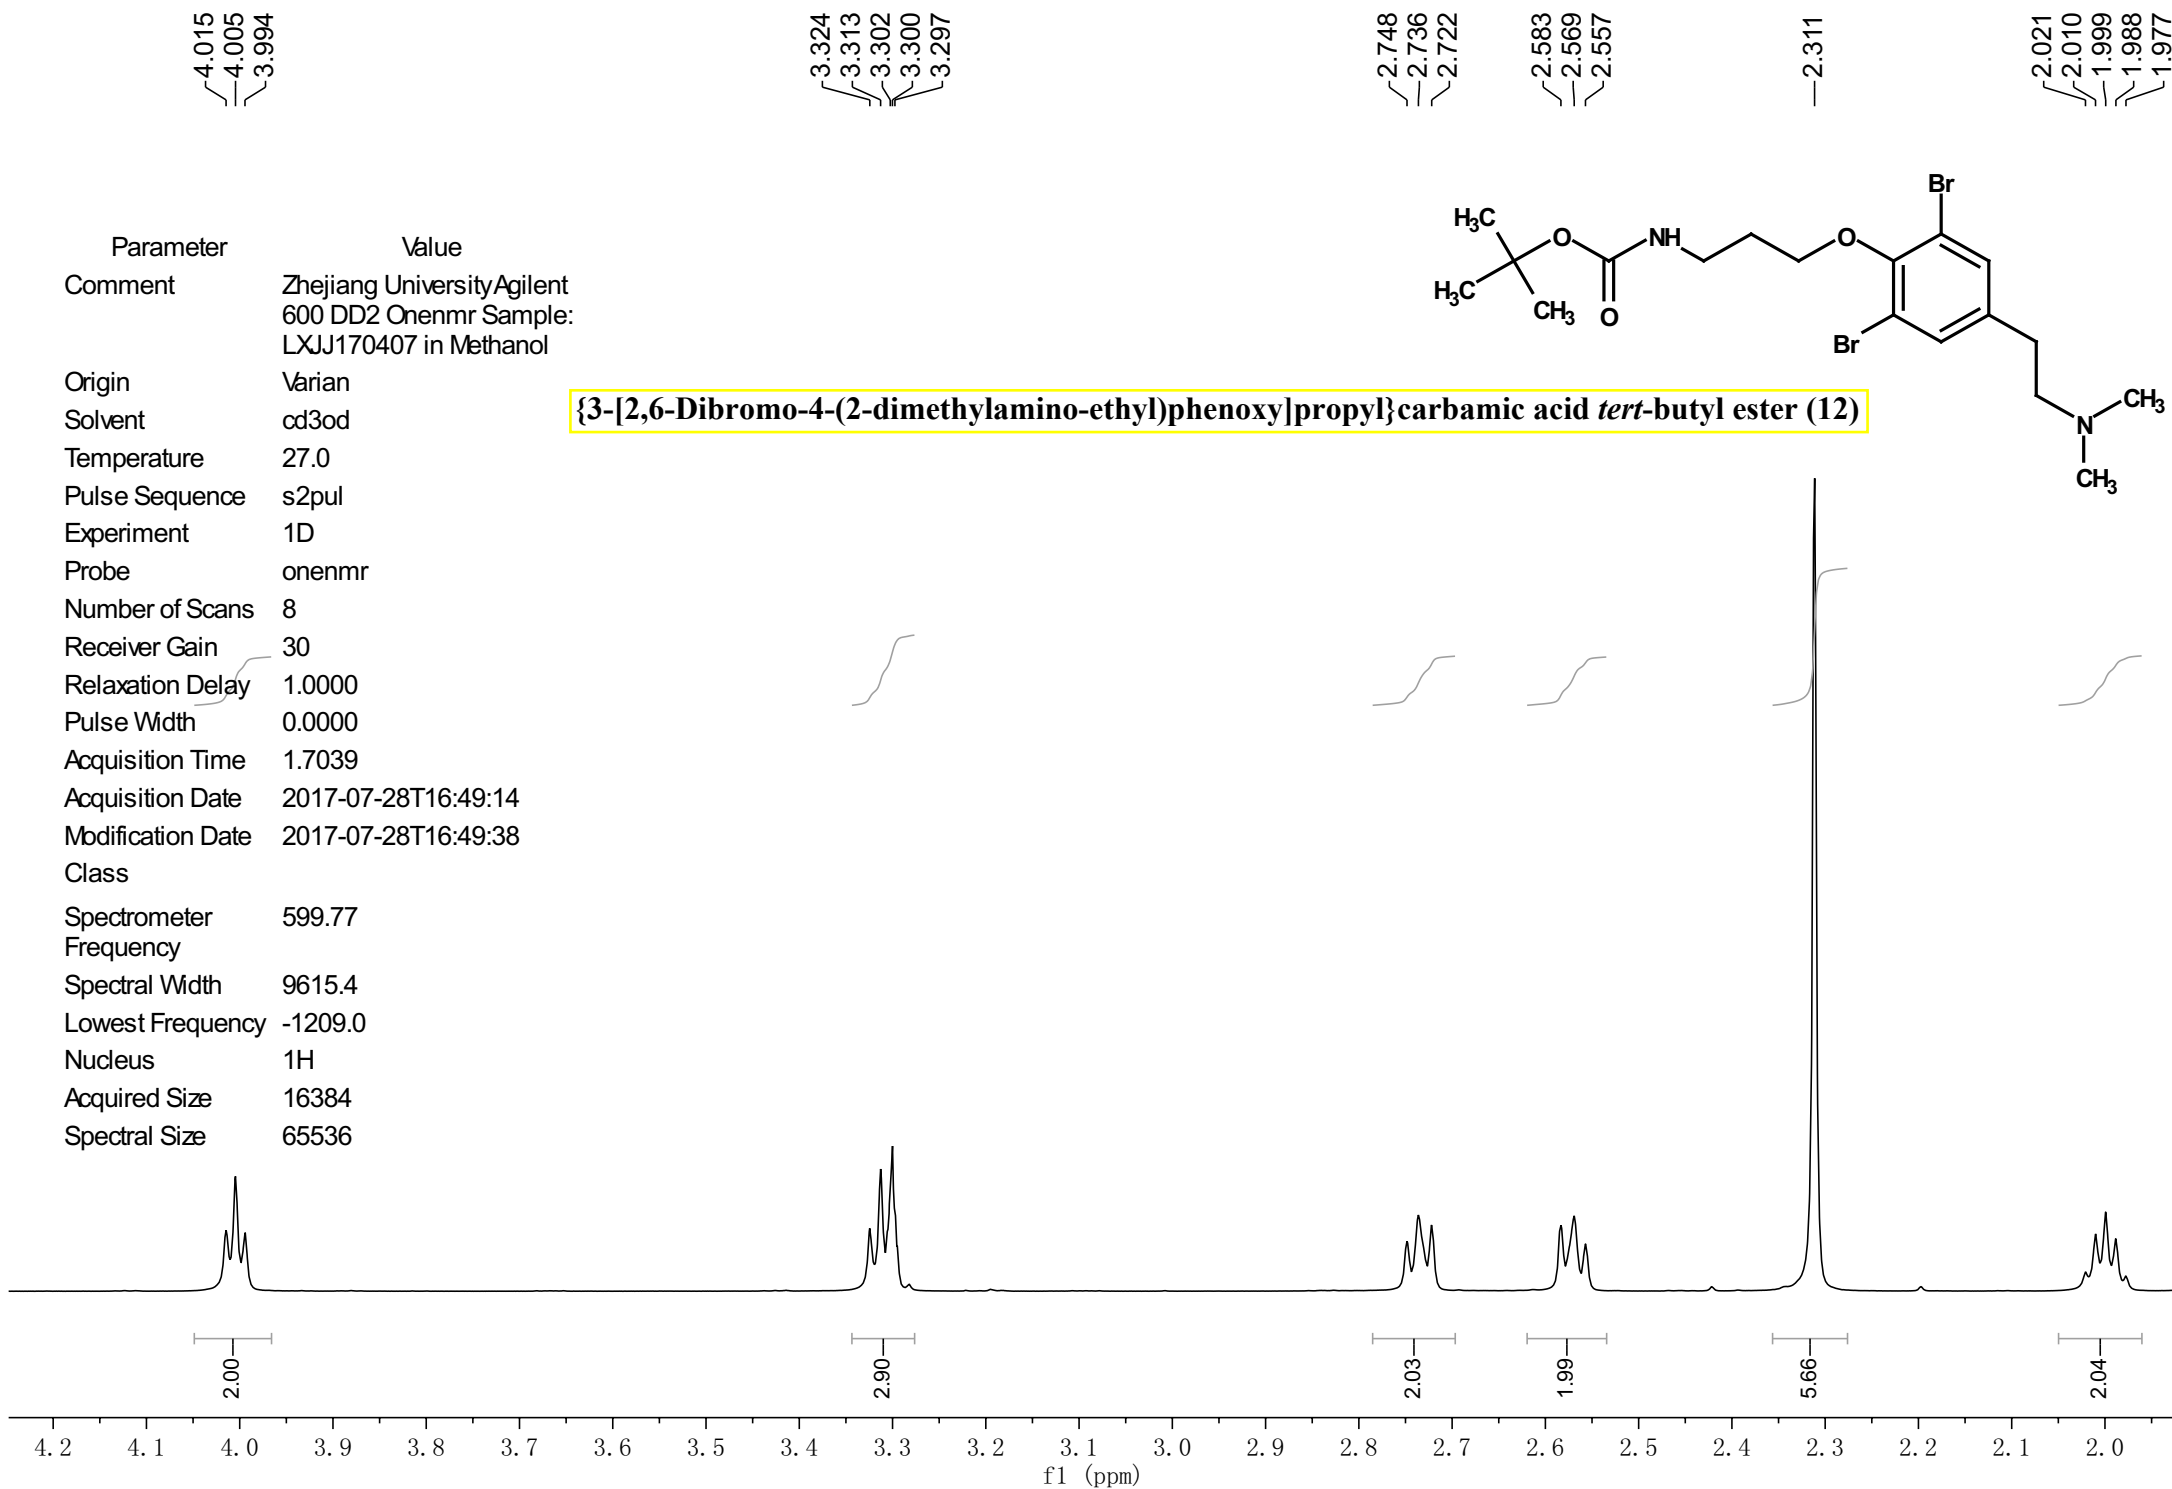

Parameter Value  
Comment xjj170407-C  
Origin Bruker BioSpin GmbH  
Solvent MeOD  
Temperature 295.2  
Pulse Sequence zgpg30  
Experiment 1D  
Probe 5 mm PABBO BB/  
19F-1H/ D Z-GRD  
Z108618/ 0497

Number of Scans 512  
Receiver Gain 193  
Relaxation Delay 1.5000  
Pulse Width 10.0000  
Presaturation  
Frequency  
Acquisition Time 1.1011  
Acquisition Date 2017-09-17T09:07:00  
Modification Date 2017-09-18T00:07:44

Class  
Spectrometer 100.62  
Frequency  
Spectral Width 29761.9  
Lowest -4677.8  
Frequency  
Nucleus 13C  
Acquired Size 32768  
Spectral Size 65536

—158.468 —152.790 —140.268 —134.090 —119.016 —79.941 —72.117 —61.518 —49.000 —45.222 ~38.636 ~33.025 ~31.281 ~28.801

**{3-[2,6-Dibromo-4-(2-dimethylamino-ethyl)phenoxy]propyl}carbamic acid *tert*-butyl ester (12)**

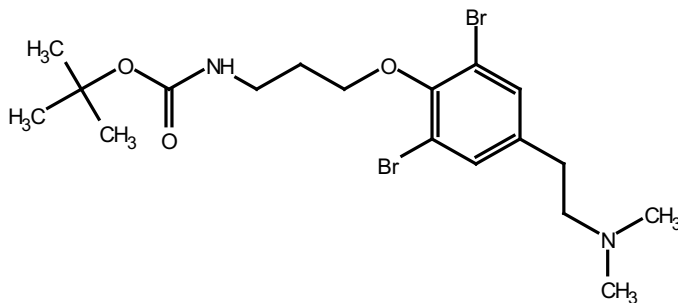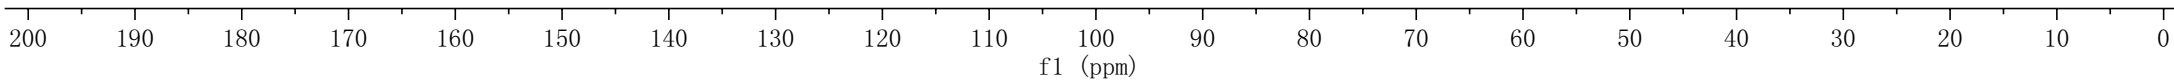



**3-[2,6-Dibromo-4-(2-dimethylamino-ethyl)-phenoxy]-propylamine dihydrochloride (4)**

| Parameter         | Value                                                                           |
|-------------------|---------------------------------------------------------------------------------|
| Comment           | Zhejiang University Agilent<br>600 DD2 Onenmr Sample:<br>XJJ170703-1 in Mehanol |
| Origin            | Varian                                                                          |
| Solvent           | cd3od                                                                           |
| Temperature       | 27.0                                                                            |
| Pulse Sequence    | s2pul                                                                           |
| Experiment        | 1D                                                                              |
| Probe             | onenmr                                                                          |
| Number of Scans   | 16                                                                              |
| Receiver Gain     | 30                                                                              |
| Relaxation Delay  | 1.0000                                                                          |
| Pulse Width       | 0.0000                                                                          |
| Acquisition Time  | 1.7039                                                                          |
| Acquisition Date  | 2017-07-26T17:02:01                                                             |
| Modification Date | 2017-07-26T17:02:16                                                             |
| Class             |                                                                                 |
| Spectrometer      | 599.77                                                                          |
| Frequency         |                                                                                 |
| Spectral Width    | 9615.4                                                                          |
| Lowest Frequency  | -1209.0                                                                         |
| Nucleus           | 1H                                                                              |
| Acquired Size     | 16384                                                                           |
| Spectral Size     | 65536                                                                           |

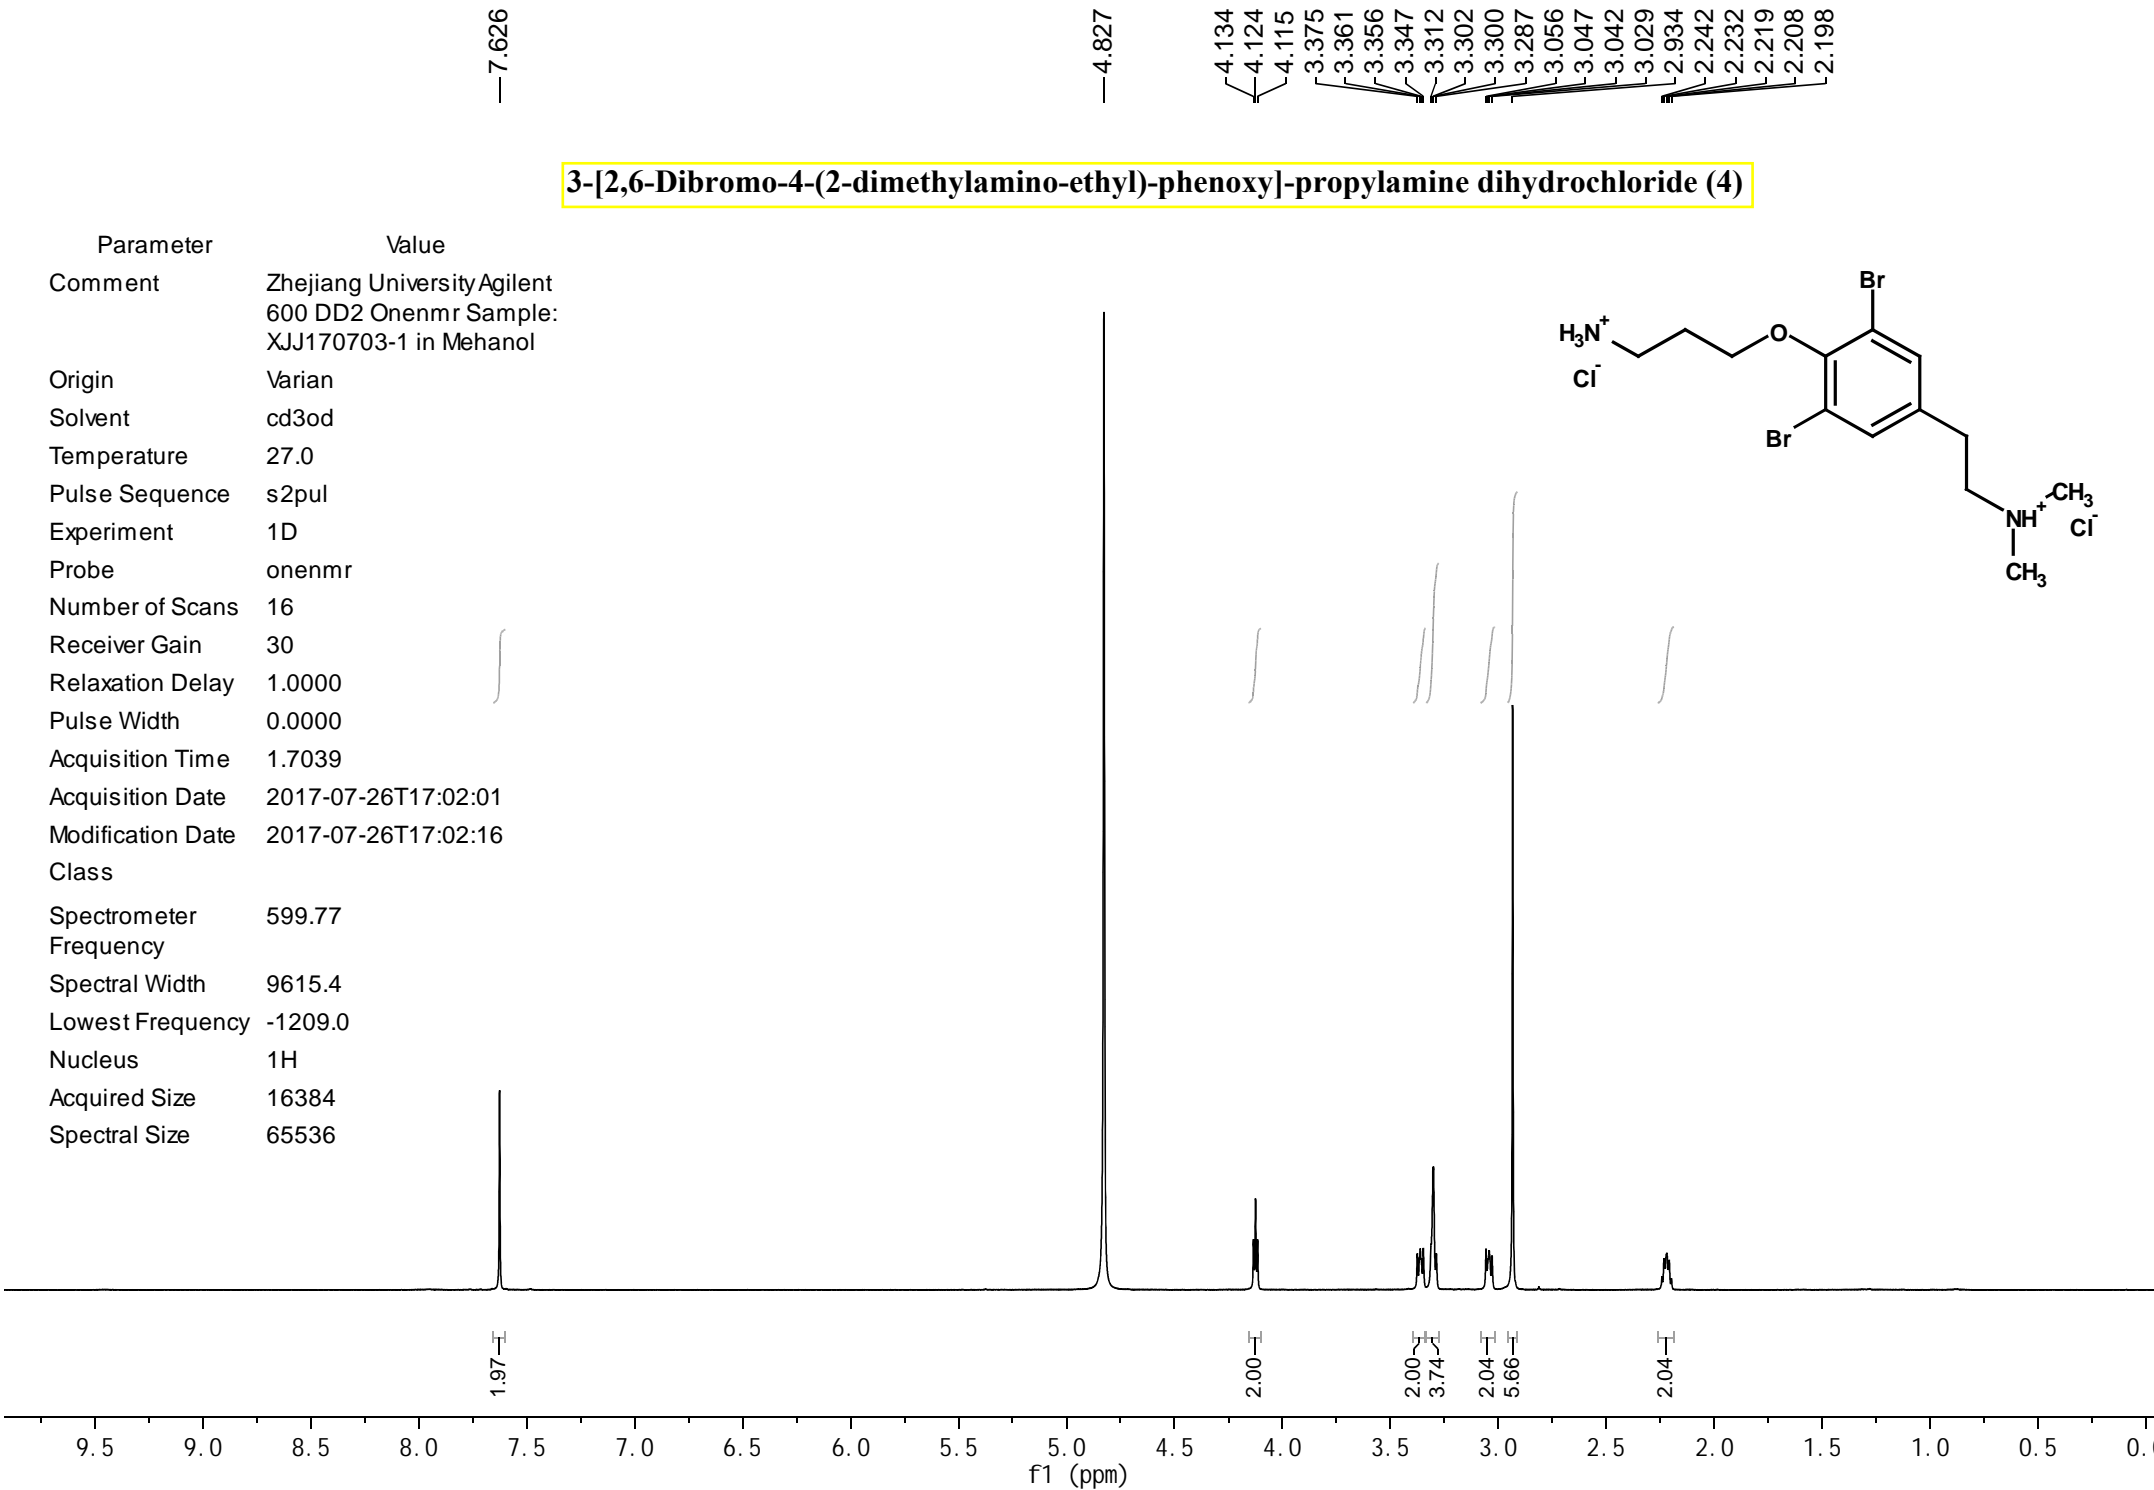

**3-[2,6-Dibromo-4-(2-dimethylamino-ethyl)-phenoxy]-propylamine dihydrochloride (4)**

| Parameter         | Value                                              |
|-------------------|----------------------------------------------------|
| Comment           | XJJ170703-1                                        |
| Origin            | Bruker BioSpin GmbH                                |
| Solvent           | MeOD                                               |
| Temperature       | 293.3                                              |
| Pulse Sequence    | zgpg30                                             |
| Experiment        | 1D                                                 |
| Probe             | 5 mm PABBO BB/<br>19F-1H/ D Z-GRD<br>Z108618/ 0497 |
| Number of Scans   | 512                                                |
| Receiver Gain     | 193                                                |
| Relaxation Delay  | 1.5000                                             |
| Pulse Width       | 10.0000                                            |
| Presaturation     |                                                    |
| Frequency         |                                                    |
| Acquisition Time  | 1.1010                                             |
| Acquisition Date  | 2017-07-06T21:19:34                                |
| Modification Date | 2017-07-06T21:19:34                                |
| Class             |                                                    |
| Spectrometer      | 100.62                                             |
| Frequency         |                                                    |
| Spectral Width    | 29761.9                                            |
| Lowest            | -4870.9                                            |
| Frequency         |                                                    |
| Nucleus           | <sup>13</sup> C                                    |
| Acquired Size     | 32768                                              |
| Spectral Size     | 65536                                              |

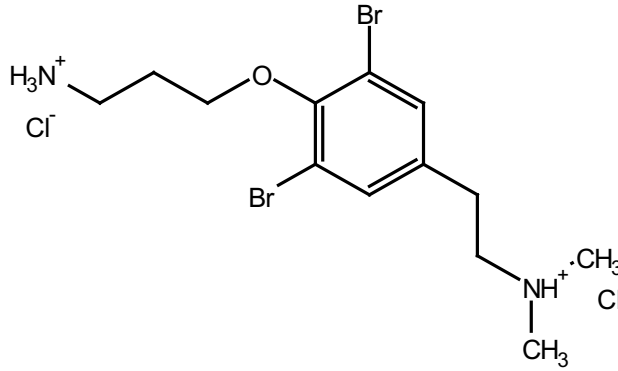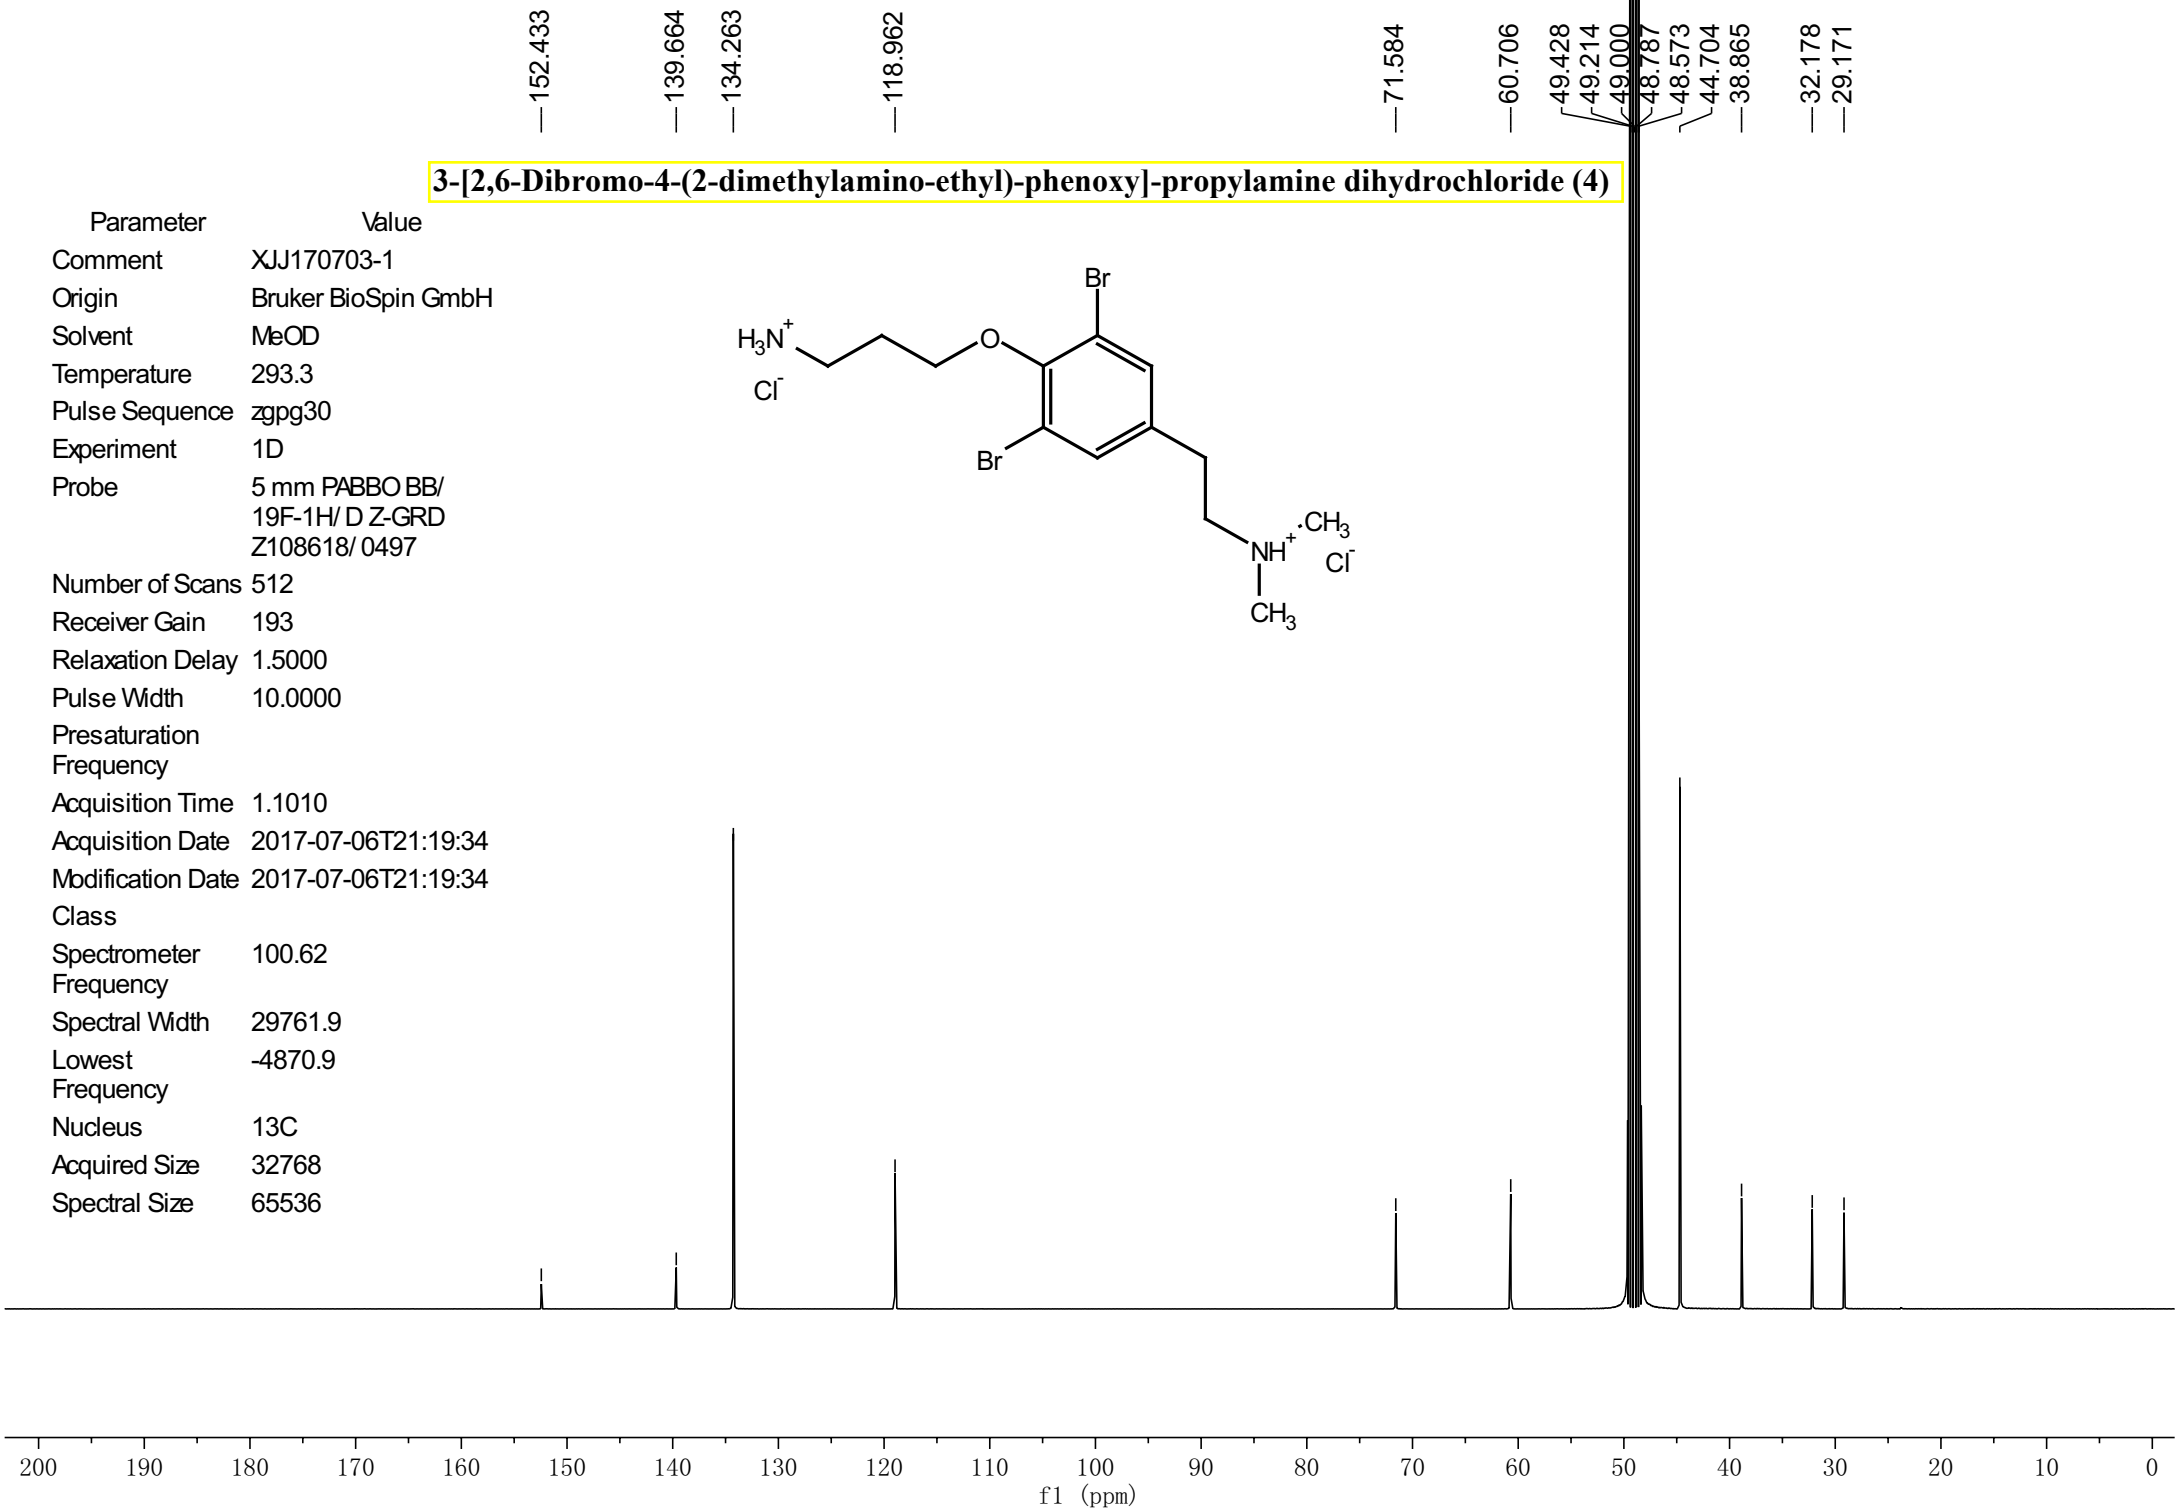

| Parameter         | Value                                           |
|-------------------|-------------------------------------------------|
| Comment           | xj170922-9                                      |
| Origin            | Bruker BioSpin GmbH                             |
| Solvent           | MeOD                                            |
| Temperature       | 292.5                                           |
| Pulse Sequence    | zg30                                            |
| Experiment        | 1D                                              |
| Probe             | 5 mm PABBO BB/ 19F-1H/<br>D Z-GRD Z108618/ 0497 |
| Number of Scans   | 16                                              |
| Receiver Gain     | 87                                              |
| Relaxation Delay  | 1.0000                                          |
| Pulse Width       | 15.0000                                         |
| Presaturation     |                                                 |
| Frequency         |                                                 |
| Acquisition Time  | 3.2769                                          |
| Acquisition Date  | 2017-09-29T14:11:00                             |
| Modification Date | 2017-09-30T05:11:28                             |
| Class             |                                                 |
| Spectrometer      | 400.13                                          |
| Frequency         |                                                 |
| Spectral Width    | 10000.0                                         |
| Lowest Frequency  | -2247.0                                         |
| Nucleus           | 1H                                              |
| Acquired Size     | 32768                                           |
| Spectral Size     | 65536                                           |

7.757  
7.439  
7.385  
7.346

6.603  
6.564

4.919

4.059  
4.044  
4.028

3.610  
3.593  
3.575  
3.310

2.739  
2.721  
2.713  
2.699  
2.693  
2.678  
2.673  
2.668  
2.654  
2.552  
2.538  
2.530  
2.513  
2.325  
2.291  
2.155  
2.142  
2.126  
2.109  
2.091  
2.074  
2.060  
2.054  
2.050  
2.035  
2.020

### Psammaplysene A (1)

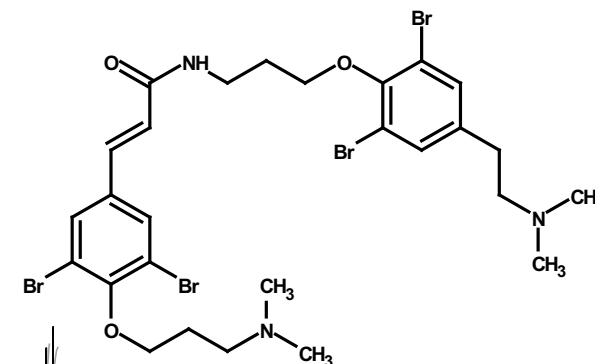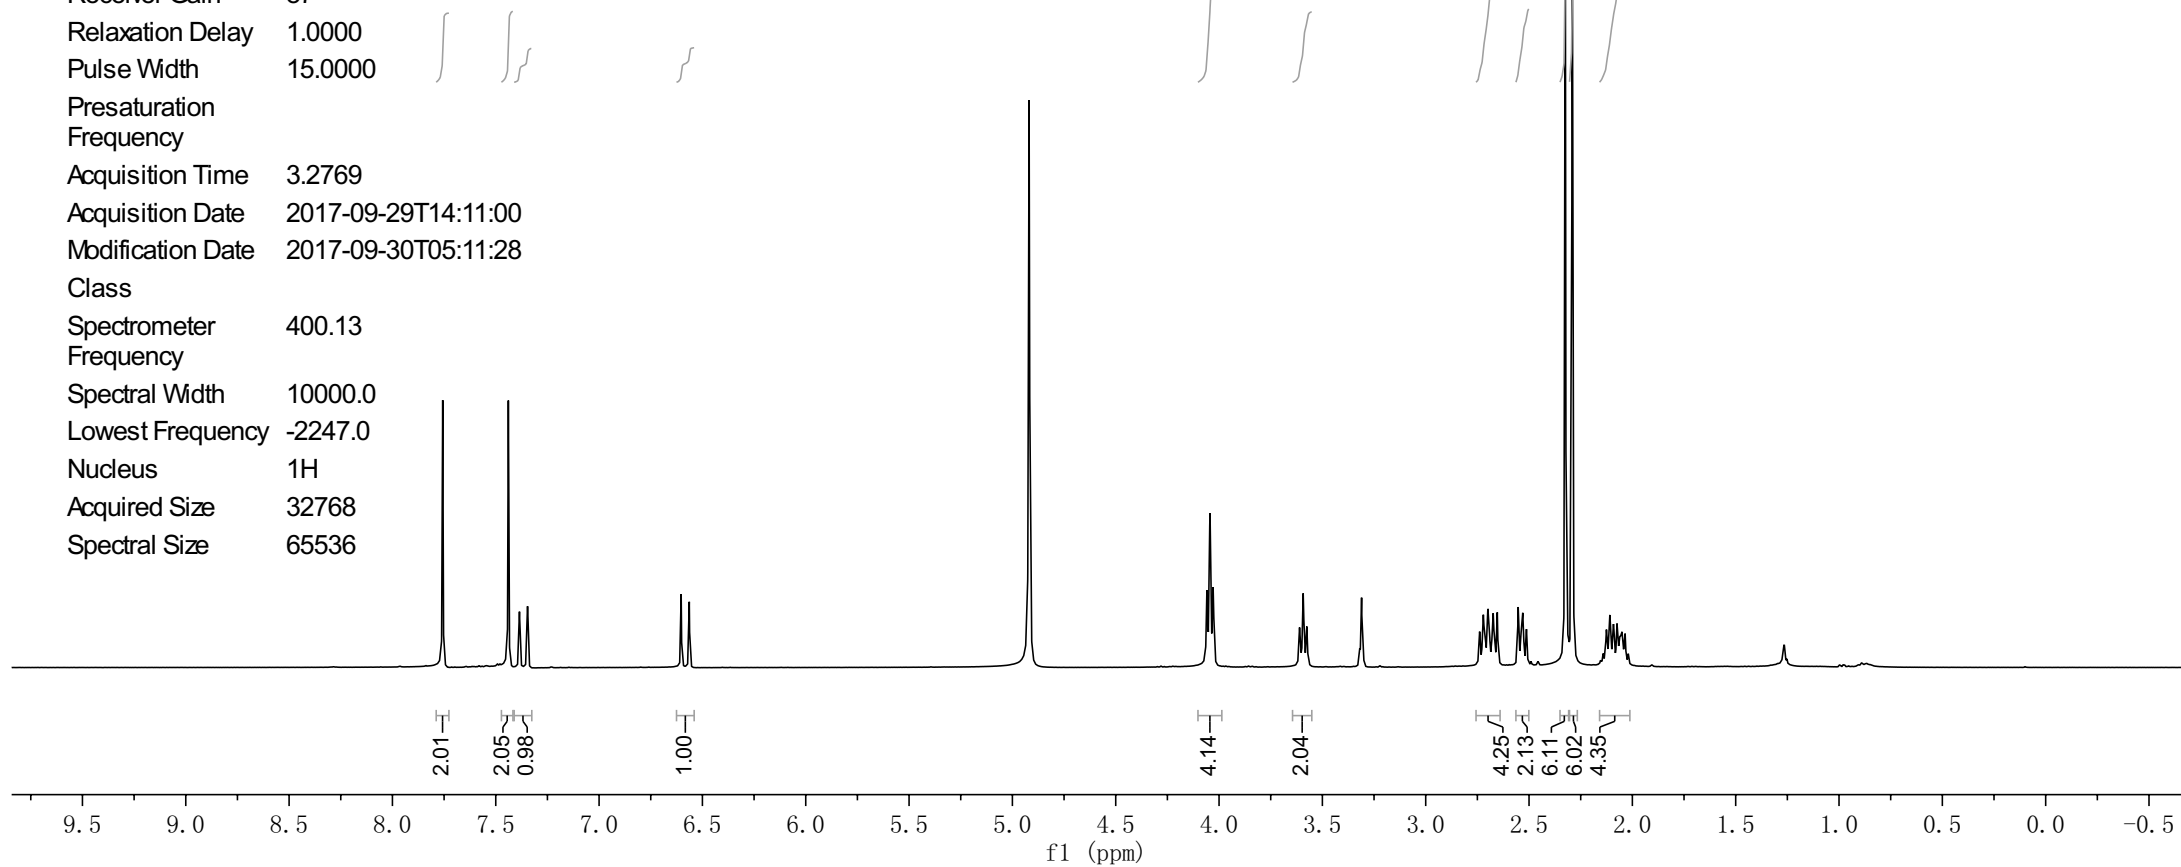

4.059  
4.044  
4.028

3.610  
3.593  
3.575

3.310

2.739  
2.721  
2.713  
2.699  
2.693  
2.678  
2.673  
2.668  
2.654  
2.552  
2.538  
2.530  
2.513

2.325  
2.291  
2.155  
2.142  
2.126  
2.109  
2.091  
2.074  
2.060  
2.054  
2.050  
2.035  
2.020

| Parameter                  | Value                                           |
|----------------------------|-------------------------------------------------|
| Comment                    | xj170922-9                                      |
| Origin                     | Bruker BioSpin GmbH                             |
| Solvent                    | MeOD                                            |
| Temperature                | 292.5                                           |
| Pulse Sequence             | zg30                                            |
| Experiment                 | 1D                                              |
| Probe                      | 5 mm PABBO BB/ 19F-1H/<br>D Z-GRD Z108618/ 0497 |
| Number of Scans            | 16                                              |
| Receiver Gain              | 87                                              |
| Relaxation Delay           | 1.0000                                          |
| Pulse Width                | 15.0000                                         |
| Presaturation<br>Frequency |                                                 |
| Acquisition Time           | 3.2769                                          |
| Acquisition Date           | 2017-09-29T14:11:00                             |
| Modification Date          | 2017-09-30T05:11:28                             |
| Class                      |                                                 |
| Spectrometer<br>Frequency  | 400.13                                          |
| Spectral Width             | 10000.0                                         |
| Lowest Frequency           | -2247.0                                         |
| Nucleus                    | 1H                                              |
| Acquired Size              | 32768                                           |
| Spectral Size              | 65536                                           |

**Psammaplysene A (1)**

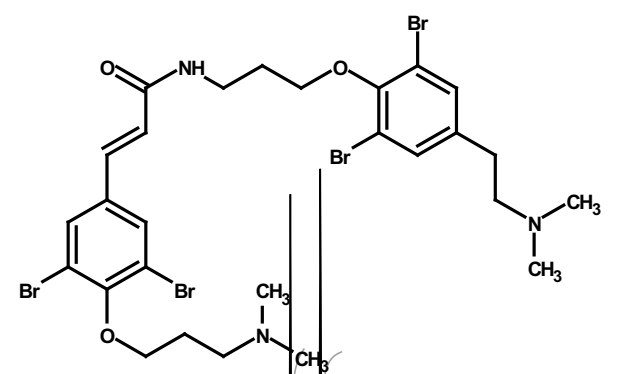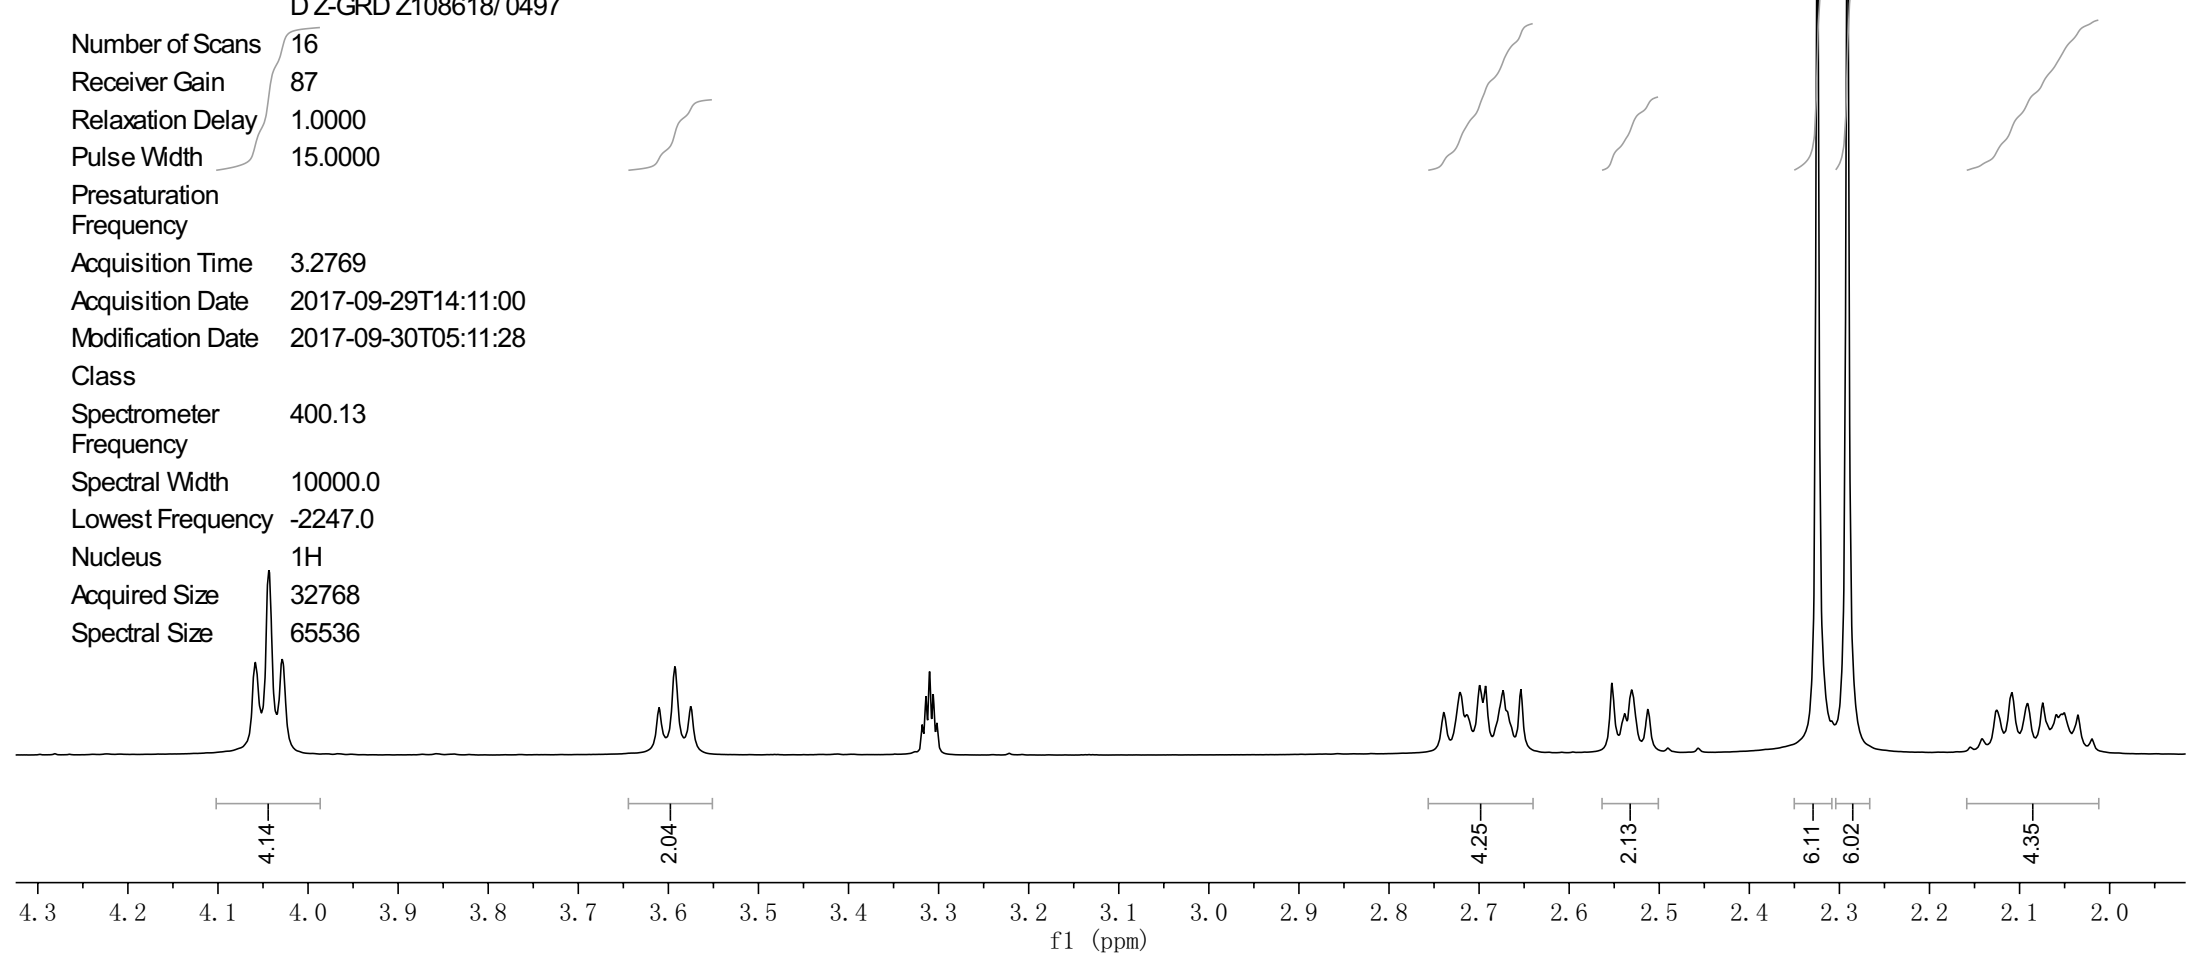

| Parameter         | Value                                              |
|-------------------|----------------------------------------------------|
| Comment           | xj170922-9                                         |
| Origin            | Bruker BioSpin GmbH                                |
| Solvent           | MeOD                                               |
| Temperature       | 294.3                                              |
| Pulse Sequence    | zgpg30                                             |
| Experiment        | 1D                                                 |
| Probe             | 5 mm PABBO BB/<br>19F-1H/ D Z-GRD<br>Z108618/ 0497 |
| Number of Scans   | 1024                                               |
| Receiver Gain     | 193                                                |
| Relaxation Delay  | 1.5000                                             |
| Pulse Width       | 10.0000                                            |
| Presaturation     |                                                    |
| Frequency         |                                                    |
| Acquisition Time  | 1.1011                                             |
| Acquisition Date  | 2017-09-29T15:17:00                                |
| Modification Date | 2017-09-30T06:17:24                                |
| Class             |                                                    |
| Spectrometer      | 100.62                                             |
| Frequency         |                                                    |
| Spectral Width    | 29761.9                                            |
| Lowest            | -4677.8                                            |
| Frequency         |                                                    |
| Nucleus           | <sup>13</sup> C                                    |
| Acquired Size     | 32768                                              |
| Spectral Size     | 65536                                              |

**Psammaplysene A (1)**

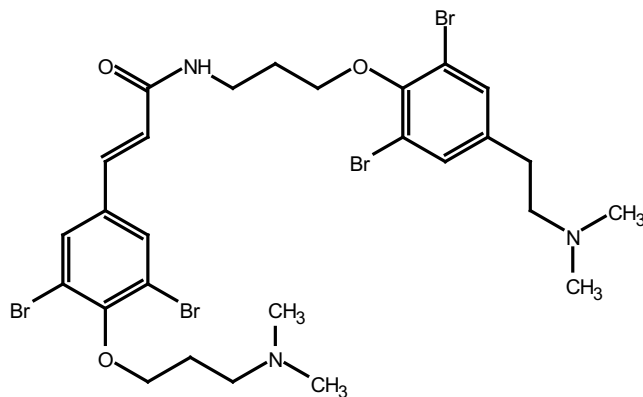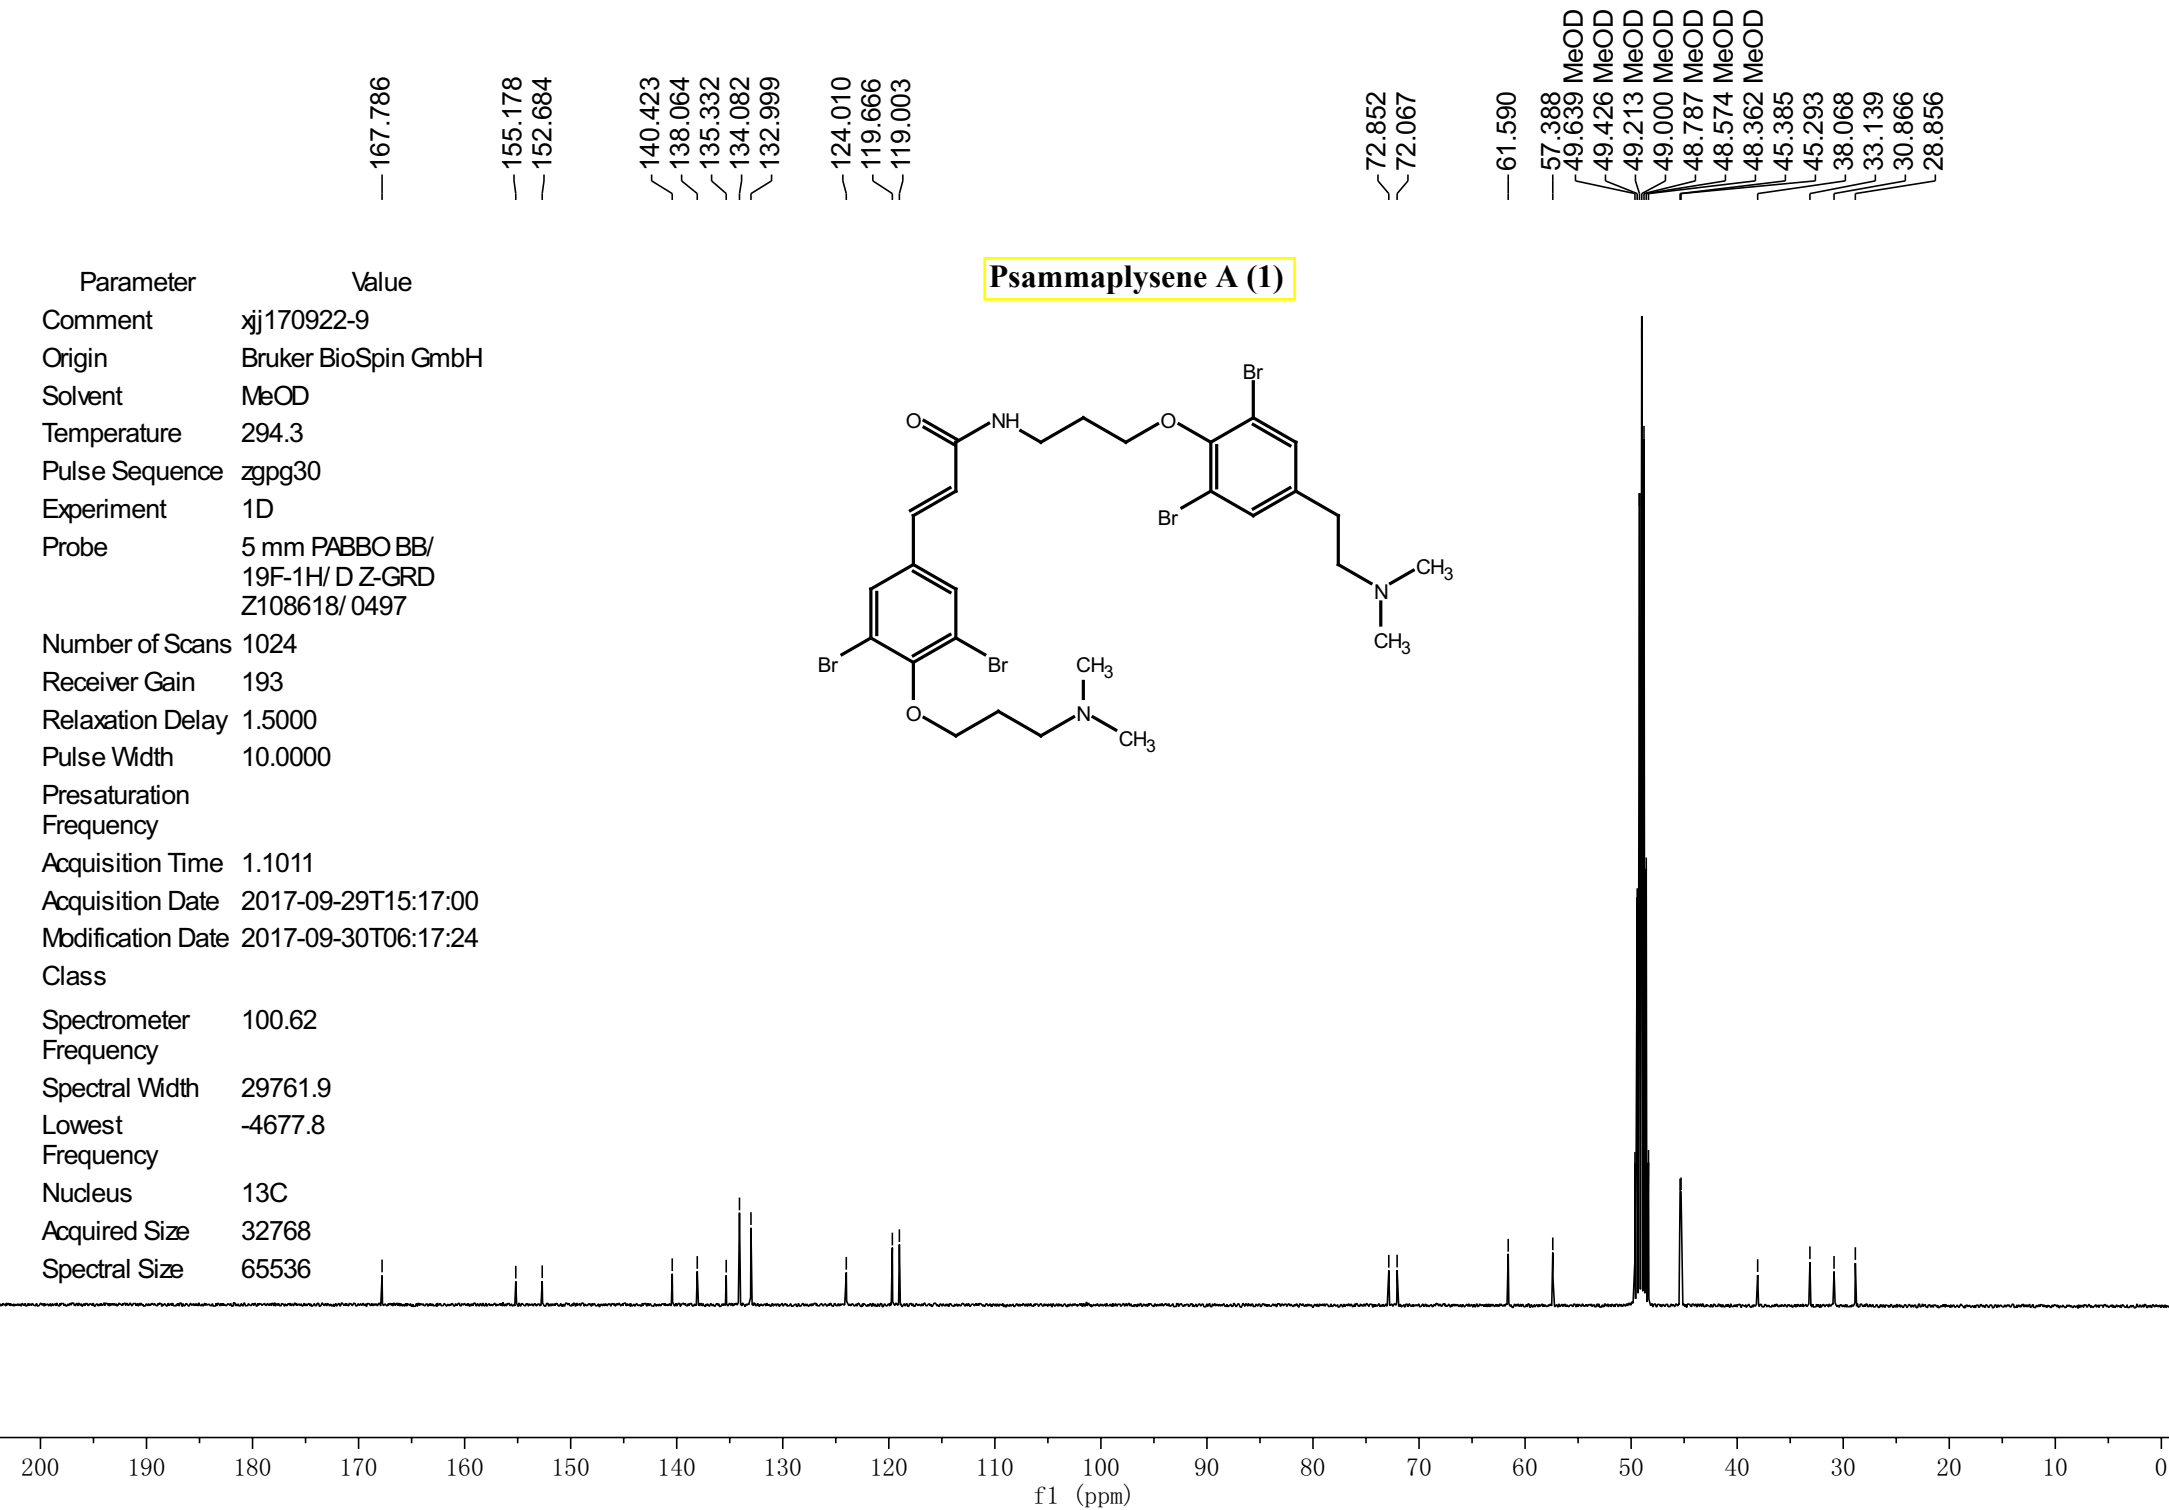

Supplement: c8ra02052c1.pdf [file c8ra02052c1.pdf]
